# Supplementary material for: Genome-wide association study identifies 14 novel risk alleles associated with basal cell carcinoma
Source: PubMed Central journal article supplement (PMC4992160; doi:10.1038/ncomms12510), 2016-08-19
Supplement: ncomms12510-s1.pdf [file ncomms12510-s1.pdf]

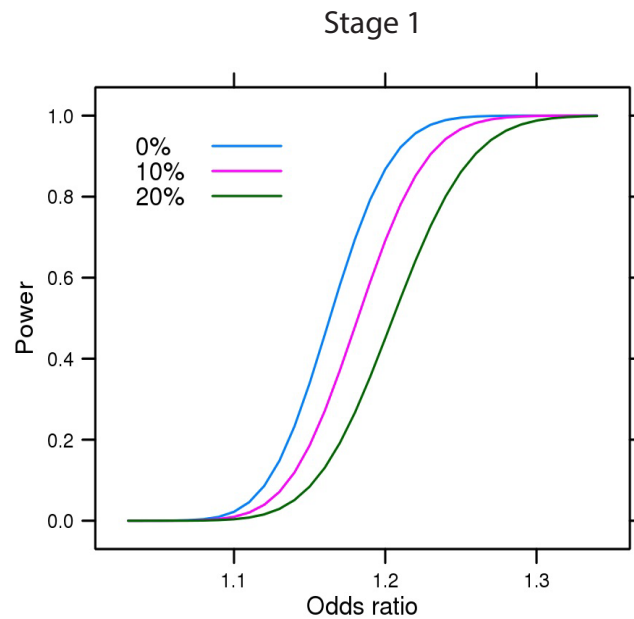

| Power | Percent misclassified cases |      |      |
|-------|-----------------------------|------|------|
|       | 0%                          | 10%  | 20%  |
| 0.2   | 1.14                        | 1.15 | 1.17 |
| 0.5   | 1.16                        | 1.18 | 1.21 |
| 0.8   | 1.19                        | 1.21 | 1.24 |

**Supplementary Figure 1.** Power to detect a variant with misclassifications rates between 0 and 20%. The top graph depicts power as a function of odds ratio for detecting a variant with minor allele frequency 0.1, with misclassification rates of 0%, 10%, and 20% (where the specified fraction of study cases are misclassified controls). The table (bottom) shows odds ratios required to achieve the specified power for a variant with minor allele frequency 0.1, based on the GWAS sample size, for misclassification rates of 0%, 10%, and 20%. To account for misclassification, expected genotype frequencies in study cases were replaced with a mixture of genotype frequencies in true cases and in true controls.

Stage 1, genotyped SNPs only

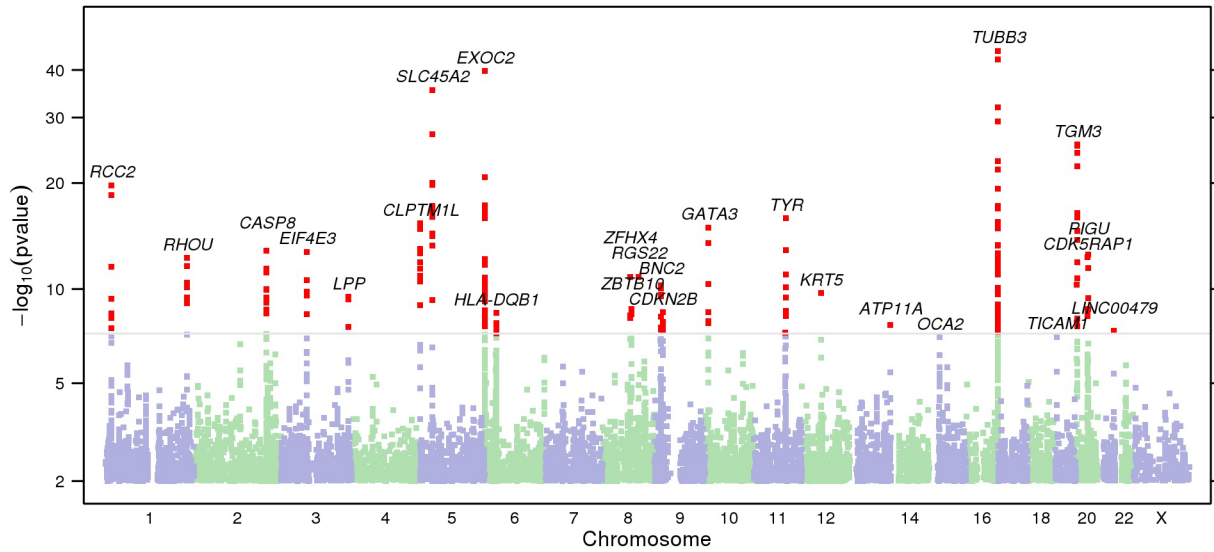

**Supplementary Figure 2.** Manhattan plot of stage 1 showing associations between genotyped SNPs and BCC. Total stage 1 GWAS analysis included 12,945 cases and 274,252 controls. Loci with smallest  $P < 10^{-6}$  (generated via logistic regression) are labeled with the name of the nearest gene; for clarity, only the 25 most significant loci are labeled. Positions with  $P < 5 \times 10^{-8}$  (genome-wide significance) are shown in red.

### Stage 1, genotyped and imputed SNPs

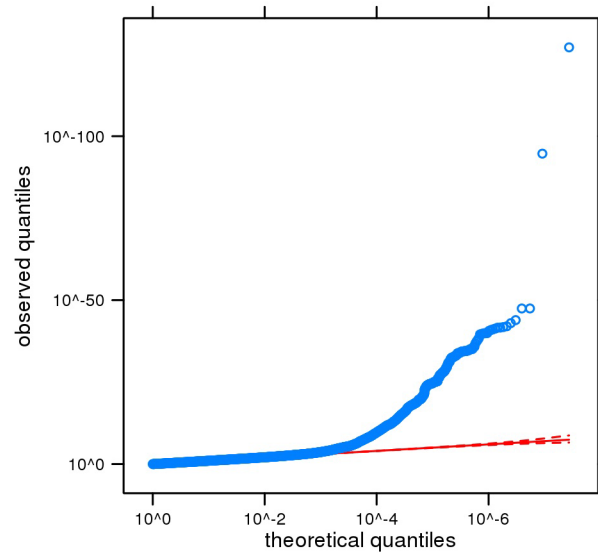

**Supplementary Figure 3.** QQ plot of observed versus expected quantiles for the BCC GWAS stage 1  $P$  values (generated via logistic regression), plotted on a log scale. The null hypothesis states that the expected distribution of  $P$  values is uniform. Here, the observed  $P$  values follow the null distribution for large  $P$  values ( $P > 0.01$ ) but then diverge for small  $P$  values. The solid red line has a slope 1 and the dashed red lines represent a 95% confidence interval, assuming the test results are independent. The test statistics in the plot have been adjusted for genomic control.

Stage 1, genotyped SNPs only

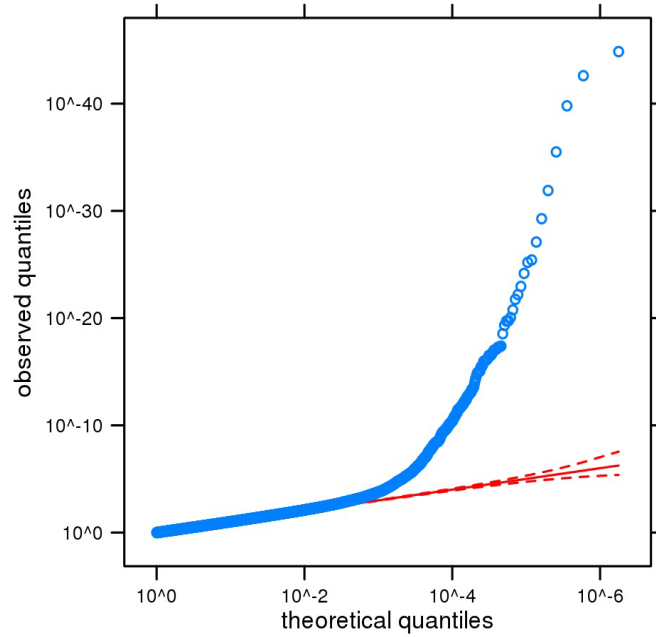

**Supplementary Figure 4.** QQ plot of observed versus expected quantiles for stage 1  $P$  values, plotted on a log scale, when only genotyped SNPs are included. The dashed line has a slope 1. (Genomic inflation factor,  $\lambda= 1.091$ ).

Stage 1, excluding 28 genome-wide significant regions

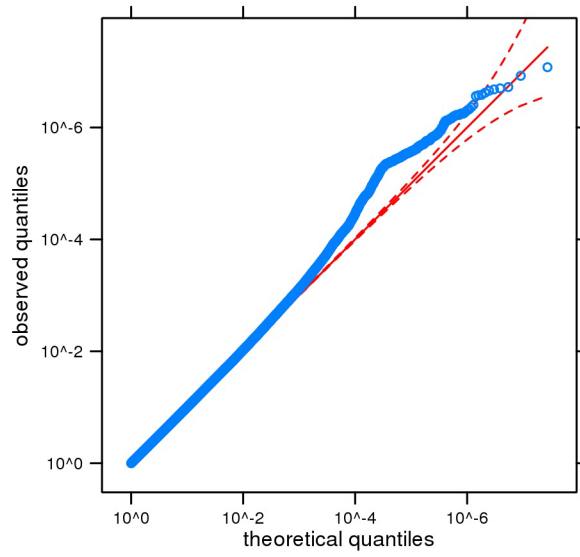

**Supplementary Figure 5.** QQ plot of observed versus expected quantiles for stage 1  $P$  values, plotted on a log scale, excluding 28 genome-wide significant loci from stage 1 and their surrounding 500kb interval. The dashed line has a slope 1.

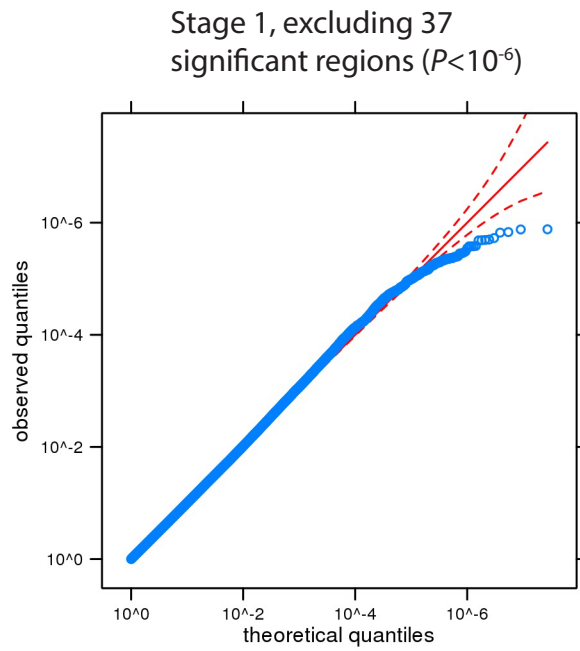

**Supplementary Figure 6.** QQ plot of observed versus expected quantiles for stage 1  $P$  values, plotted on a log scale, excluding 37 significant loci ( $P < 10^{-6}$ ) from stage 1 and their surrounding 500kb interval. The dashed line has a slope 1.

Stage 2, imputed and genotyped SNPs

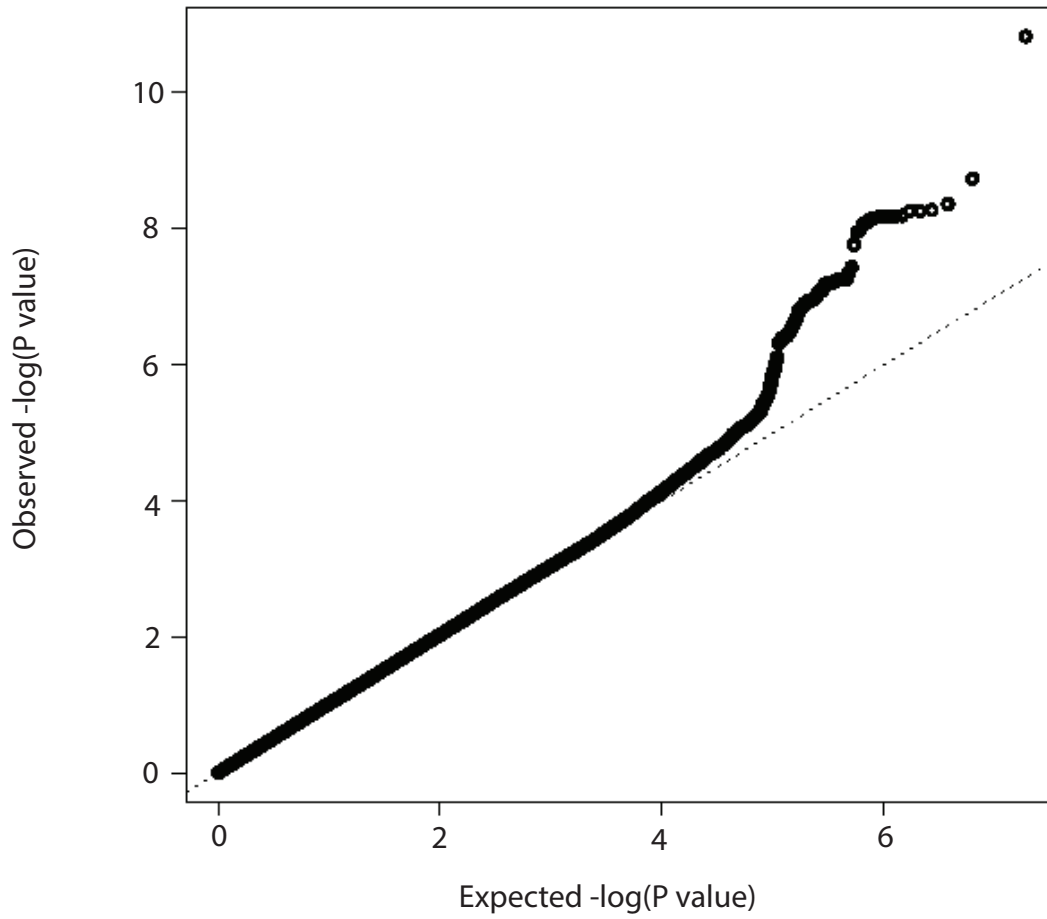

**Supplementary Figure 7.** QQ plot of observed versus expected quantiles for stage 2  $P$  values, plotted on a log scale. The dashed line has a slope 1. (Genomic inflation factor,  $\lambda=1.023$ ).

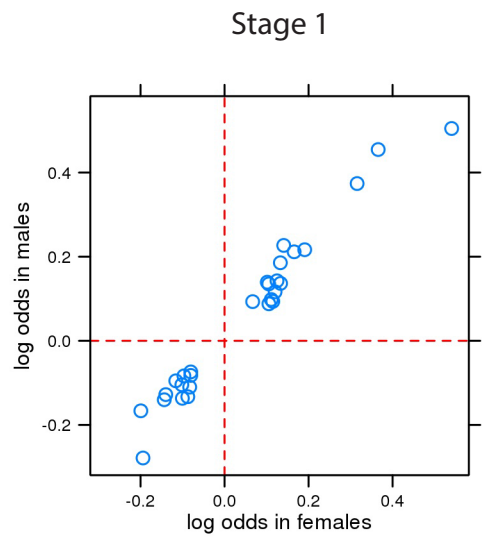

**Supplementary Figure 8.** Effect sizes estimated in men versus women, for the 28 genome-wide significant loci from stage 1.



### Stage 1

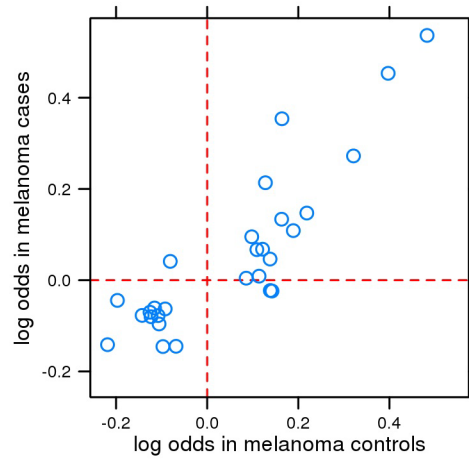

**Supplementary Figure 9.** Effect sizes estimated in individuals with melanoma versus individuals without melanoma, for the 28 genome-wide significant loci from stage 1.

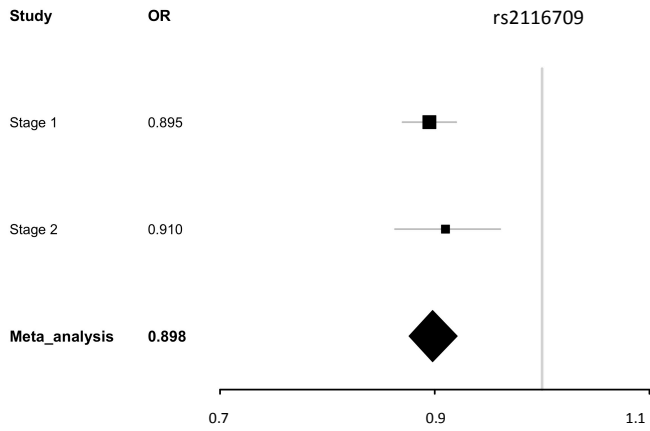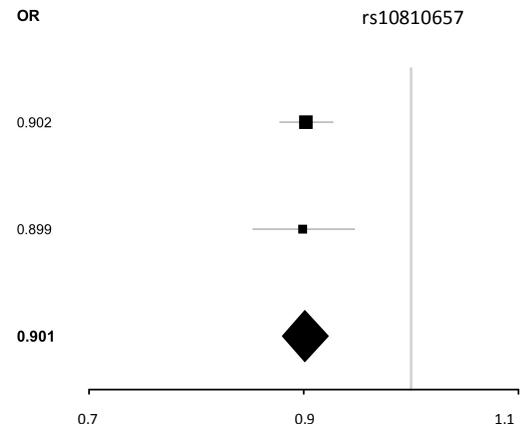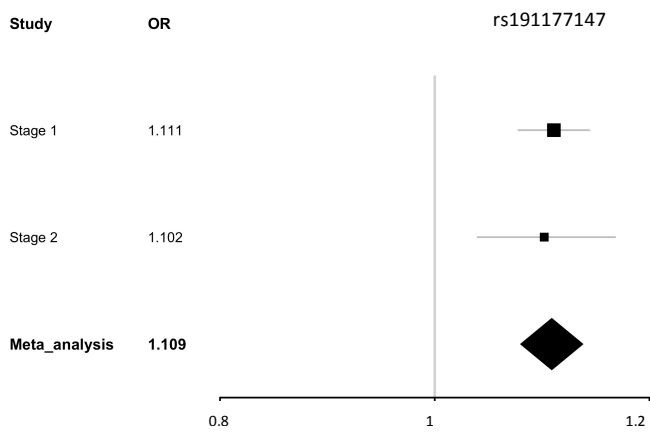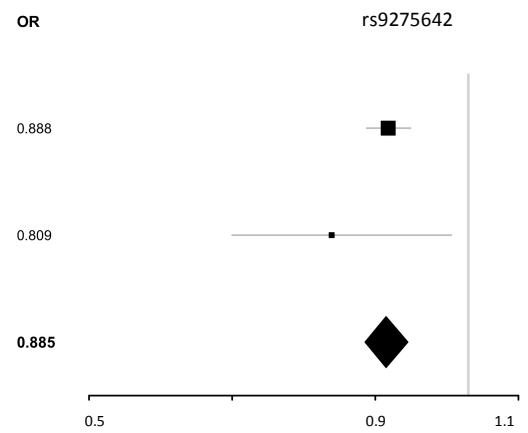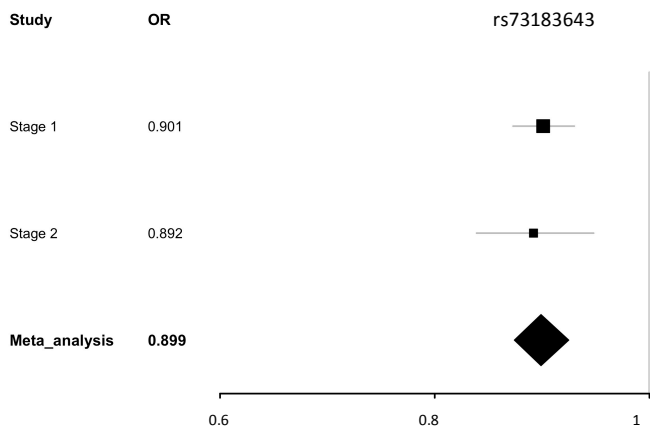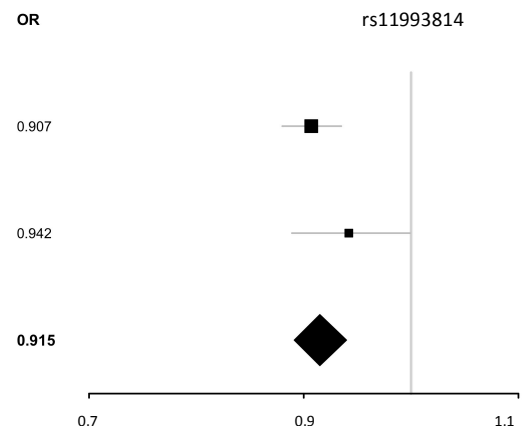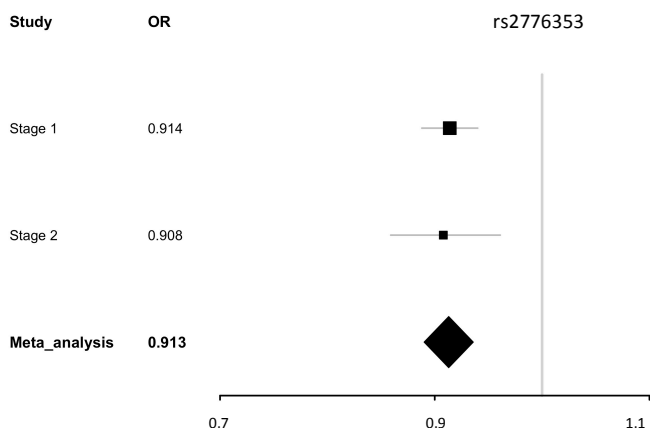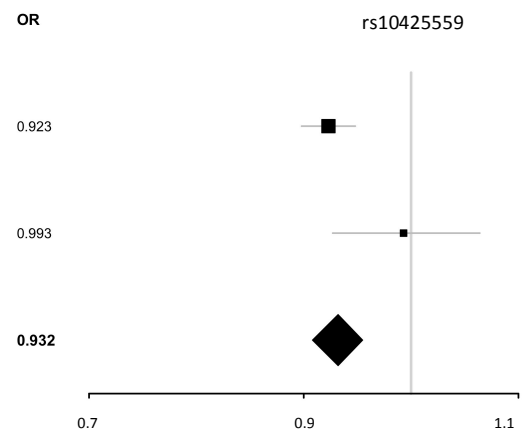

**Supplementary Figure 10**

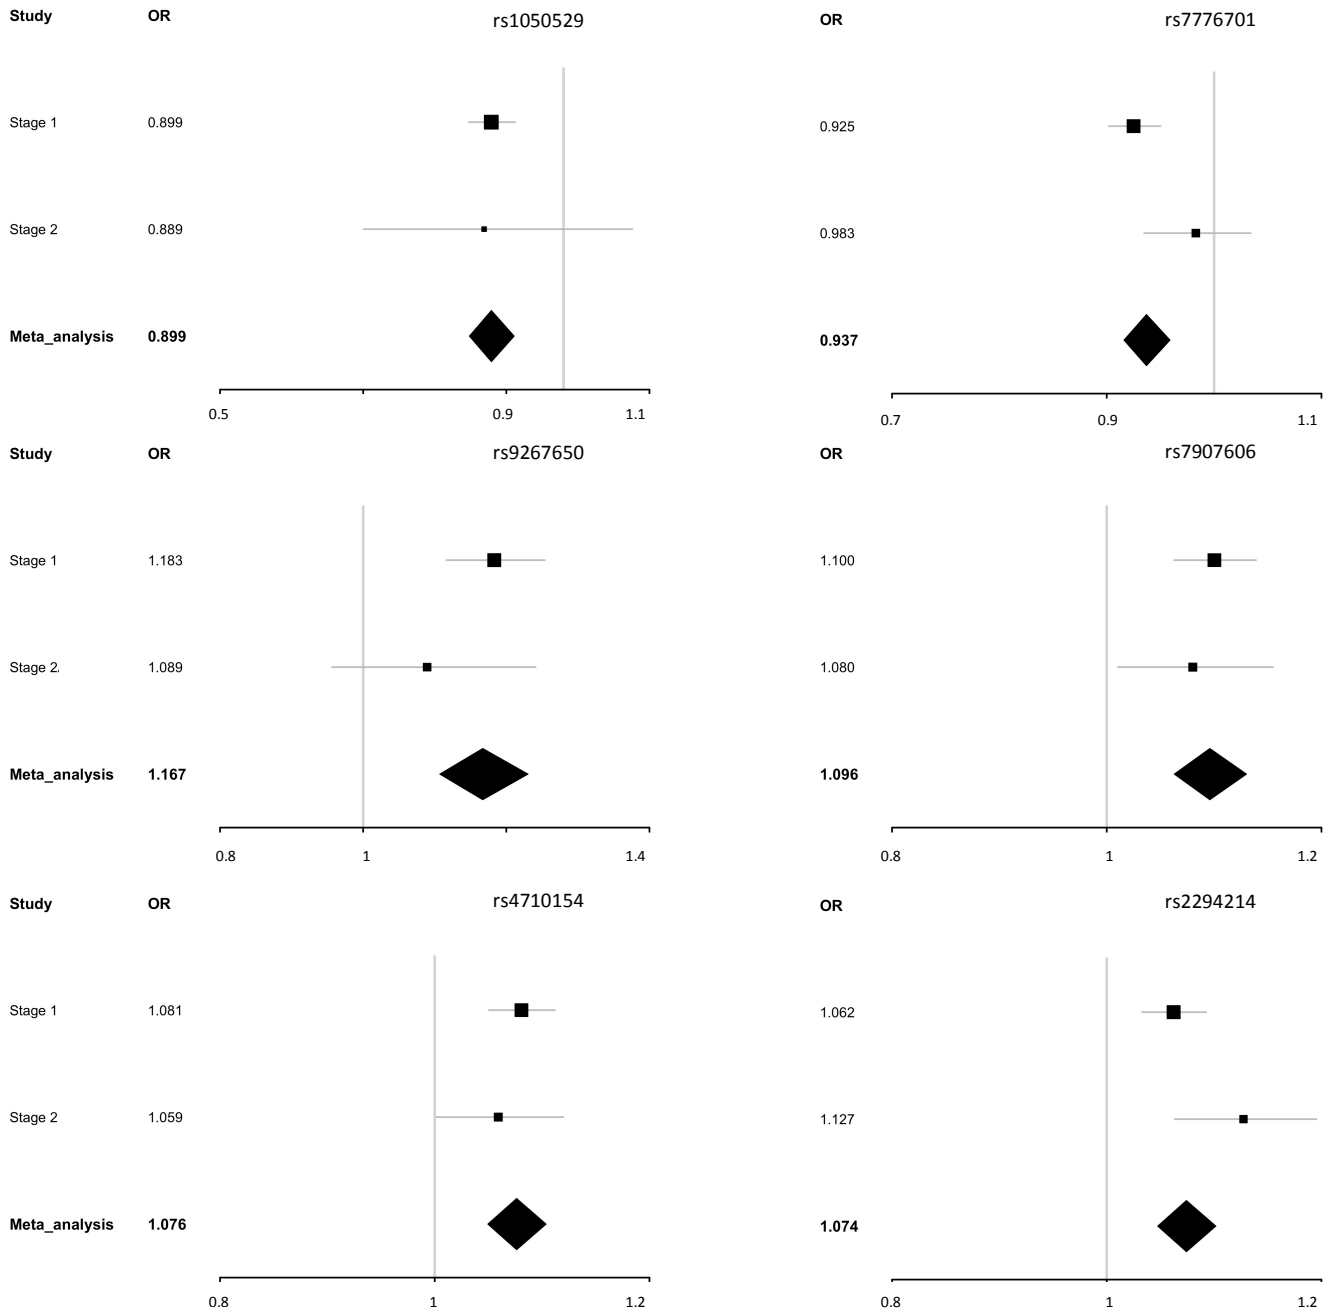

**Supplementary Figure 10.** Forest plots for each of the 14 novel SNPs reaching genome-wide significance for association with BCC (via logistic regression). For all plots, x-axis displays odds ratio (OR) values and gray vertical lines represent an odds ratio (OR) of 1. Each black square indicates OR from the corresponding stage and horizontal gray lines represent 95% CI. The center of each diamond represents the OR for the overall meta-analysis, and the width of each diamond represents the 95% CI.



**Supplementary Figure 11.** Regional association plots for the first 8 of 14 novel, genome-wide significant BCC susceptibility loci are shown. Left to right, beginning from top left: 3p13 (rs2116709, *FOXP1*), 9p22.2 (rs10810657, near *BNC2*), 3q28 (rs191177147, *LPP*), 6p21.32 (rs9275642, *HLA-DQA2*), 7q22.1 (rs73183643, *CUX1*), 8q21.13 (rs11993814, *ZBTB10*), 21q22.3 (rs2776353, *LINC00111*), 19p13.3.2 (rs10425559, *PLIN3*). Each plot displays  $-\log_{10}(P \text{ value})$  versus genomic position based on stage 1 logistic regression association testing. The color scale indicates strength of linkage disequilibrium ( $r^2$ ) for nearby SNPs, with respect to the index SNP. To preserve detail, results with  $P < 10^{-100}$  are set to  $10^{-100}$ . The “o” and “+” symbols represent genotyped and imputed SNPs, respectively. Recombination rates, in cM/Mb, are also plotted (navy blue lines). These plots were generated via LocusZoom, using LD data from the March 2012 release of 1000 Genomes data.

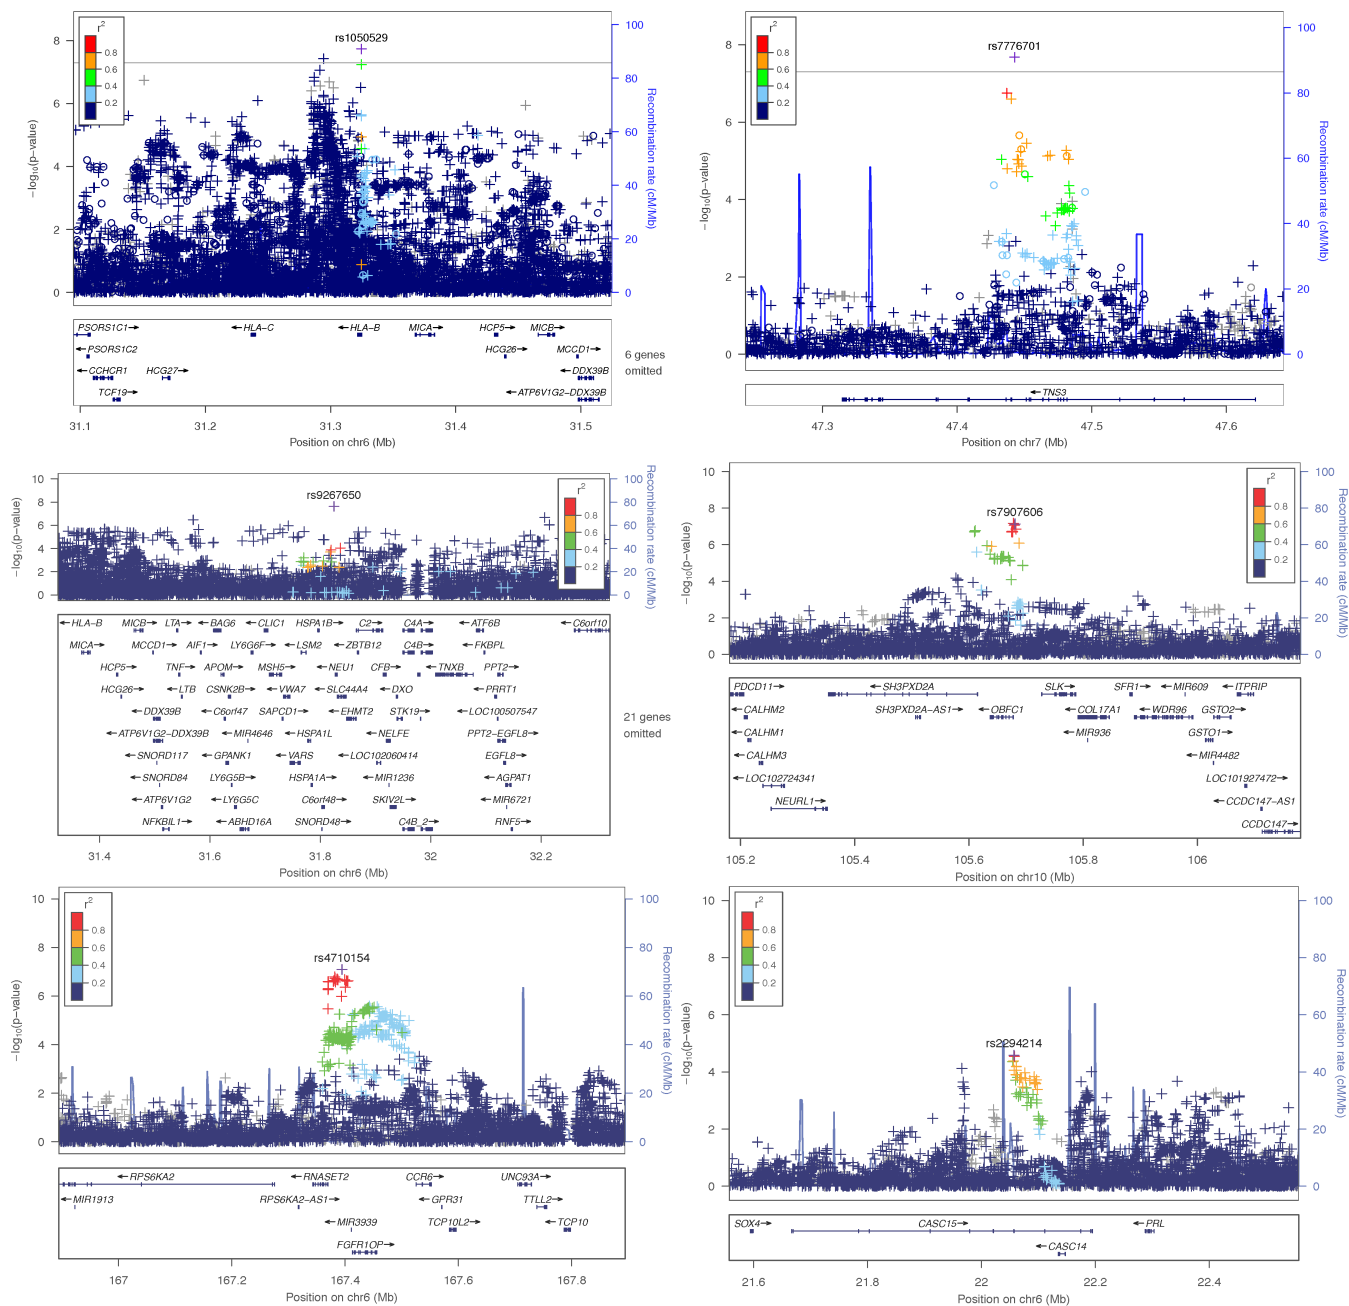

**Supplementary Figure 12.** Regional association plots for 6 of 14 novel, genome-wide significant BCC susceptibility loci are shown. Left to right, beginning from top left: 6p21.3 (rs1050529, *HLA-B*), 7p12.3 (rs7776701, *TNS3*), 6p21.3 (rs9267650, *NEU1*), 10q24.3 (rs7907606, *OBFC1*), 6q27 (rs4710154, *MIR3939*), 6p22.3 (rs2294214, *CASC15*). Each plot displays  $-\log_{10}(P\text{-value})$  versus genomic position based on stage 1 logistic regression association testing.

**Supplementary Table 1. Gender and age of BCC cases and controls from two-stage GWAS**

|                                            | Status          | n (%)         | Male (%)    | Age < 31 yr | Age 31-45   | Age 46-60   | Age > 60    |
|--------------------------------------------|-----------------|---------------|-------------|-------------|-------------|-------------|-------------|
| <b>23andMe (Stage 1, n = 287197)</b>       | <i>Cases</i>    | 12945 (4.5)   | 6700 (52)   | 42 (0.3)    | 650 (5)     | 3194 (25)   | 9059 (70)   |
|                                            | <i>Controls</i> | 274252 (95.5) | 148415 (54) | 39673 (14)  | 83162 (30)  | 74977 (27)  | 76440 (28)  |
| <b>Harvard (Stage 2, n = 17044)</b>        |                 |               |             |             |             |             |             |
| <i>Affy</i>                                | <i>Cases</i>    | 1777 (24.7)   | 834 (46.9)  | 5 (0.3)     | 500 (28.1)  | 978 (55.0)  | 294 (16.5)  |
|                                            | <i>Controls</i> | 5411 (75.3)   | 2385 (44.1) | 43 (0.8)    | 2068 (38.2) | 2533 (46.8) | 767 (14.2)  |
| <i>Illumina</i>                            | <i>Cases</i>    | 1268 (25.6)   | 368 (29.0)  | 6 (0.5)     | 472 (37.2)  | 678 (53.5)  | 112 (8.8)   |
|                                            | <i>Controls</i> | 3685 (74.4)   | 1029 (27.9) | 33 (0.9)    | 1681 (45.6) | 1692 (45.9) | 279 (7.6)   |
| <i>Omni</i>                                | <i>Cases</i>    | 1197 (24.4)   | 447 (37.3)  | 4 (0.3)     | 403 (33.7)  | 645 (53.9)  | 145 (12.1)  |
|                                            | <i>Controls</i> | 3706 (75.6)   | 1238 (33.4) | 34 (0.9)    | 1671 (45.1) | 1651 (44.5) | 350 (9.4)   |
| <b>All, Stage 2</b>                        | <i>Cases</i>    | 4242 (24.9)   | 1649 (38.9) | 15 (0.4)    | 1375 (32.4) | 2301 (54.2) | 551 (13.0)  |
|                                            | <i>Controls</i> | 12802 (75.1)  | 4652 (36.3) | 110 (0.9)   | 5420 (42.3) | 5876 (45.9) | 1396 (10.9) |
| <b>Combined meta-analysis (n = 304241)</b> | <i>Cases</i>    | 17187 (5.6)   | 8349 (49)   | 57 (0.3)    | 2025 (12)   | 5495 (32)   | 9610 (56)   |
|                                            | <i>Controls</i> | 287054 (94.4) | 153067 (53) | 39783 (14)  | 88582 (31)  | 80853 (28)  | 77836 (27)  |

Counts and percentages for cases and controls (n (%)) are listed above, stratified by stage of GWAS. We also report number and percentage of male subjects, subjects with age < 31 years, subjects with age 30-45 years, subjects with age 45-60 years, and subjects with age > 60 years. Stage 2 cases and controls are further subdivided based on platform used for genotyping.

**Supplementary Table 2. Sensitivity and specificity of self-report data with respect to BCC diagnosis**

| n = 190         | Disease (+)              | Disease (-) |
|-----------------|--------------------------|-------------|
| Self-report (+) | 42                       | 1           |
| Self-report (-) | 3                        | 144         |
|                 | <b>Sensitivity = 93%</b> |             |
|                 | <b>Specificity = 99%</b> |             |

Within table, from left to right, are counts for true positives, false positives, false negatives, and true negatives. Data from 190 randomly selected patients at Stanford outpatient clinics.



**Supplementary Table 3. Association of 28 imputed and genotyped index SNPs from stage 1 with BCC**

| Locus    | Nearby genes          | Imputed SNP | Imputed position | Imputation P-value | Genotyped SNP | Genotyped position | Genotyped P-value |
|----------|-----------------------|-------------|------------------|--------------------|---------------|--------------------|-------------------|
| 6p25.3   | <i>IRF4</i>           | rs12203592  | 396321           | 7.9E-128           | rs12210050    | 475489             | 1.6E-40           |
| 16q24.3  | <i>MC1R</i>           | rs1805007   | 89986117         | 3.5E-48            | rs1805007     | 89986117           | 1.4E-45           |
| 20p13    | <i>TGM3</i>           | rs214785    | 2283457          | 4.4E-26            | rs214796      | 2286343            | 3.8E-26           |
| 5p13.2   | <i>SLC45A2</i>        | rs35407     | 33946571         | 5.8E-26            | rs16891982    | 33951693           | 3.2E-36           |
| 20q11.22 | <i>RALY</i>           | rs6059655   | 32665748         | 2.5E-22            | rs910873      | 33171772           | 2.4E-13           |
| 1p36.13  | <i>RCC2</i>           | rs57142672  | 17744536         | 9.3E-21            | rs6688886     | 17753639           | 1.9E-20           |
| 10p14    | <i>GATA3</i>          | rs73635312  | 8935998          | 8.5E-20            | rs290903      | 8936140            | 8.5E-16           |
| 11q14.3  | <i>TYR</i>            | rs1126809   | 89017961         | 7.7E-19            | rs1393350     | 89011046           | 1.1E-16           |
| 5p15.33  | <i>CLPTM1L</i>        | rs421284    | 1325590          | 2.0E-17            | rs401681      | 1322087            | 3.4E-16           |
| 2q33.1   | <i>ALS2CR12/CASP8</i> | rs2080303   | 202165206        | 1.4E-14            | rs10931936    | 202143928          | 1.2E-13           |
| 1q42.13  | <i>RHOU</i>           | rs61824911  | 228979737        | 4.4E-14            | rs71074       | 229003739          | 4.5E-13           |
| 3p13     | <i>FOXP1/EIF4E3</i>   | rs2116709   | 71621669         | 8.7E-14            | rs9828619     | 71626123           | 1.4E-13           |
| 15q13.1  | <i>OCA2/HERC2</i>     | rs12916300  | 28410491         | 1.5E-13            | rs16950987    | 28526228           | 6.0E-07           |
| 8q22.2   | <i>RGS22</i>          | rs141115006 | 101005020        | 2.4E-13            | rs7006527     | 101024505          | 1.4E-11           |
| 9p22.2   | <i>BNC2</i>           | rs10810657  | 16884586         | 4.9E-13            | rs2153271     | 16864521           | 5.3E-11           |
| 8q21.11  | <i>ZFHX4</i>          | rs10093547  | 77474545         | 7.4E-12            | rs17431544    | 77467488           | 1.4E-11           |
| 3q28     | <i>LPP</i>            | rs191177147 | 188092546        | 2.2E-11            | rs9851967     | 188087628          | 3.5E-10           |
| 6p21.32  | <i>HLA-DQB1/DQA2</i>  | rs9275642   | 32684935         | 7.7E-11            | rs4947342     | 32653070           | 3.3E-09           |
| 9p21.3   | <i>CDKN2B</i>         | rs7874604   | 22054690         | 1.8E-10            | rs7044859     | 22018781           | 3.1E-09           |
| 12q13.13 | <i>KRT5</i>           | rs11170164  | 52913668         | 2.7E-10            | rs11170164    | 52913668           | 1.9E-10           |
| 7q22.1   | <i>CUX1</i>           | rs73183643  | 101418653        | 4.6E-10            | rs11977362    | 101381523          | 3.3E-06           |
| 8q21.13  | <i>ZBTB10</i>         | rs11993814  | 81389791         | 1.4E-09            | rs7830160     | 81381871           | 1.9E-09           |
| 21q22.3  | <i>LINC00111</i>      | rs2776353   | 43089017         | 2.3E-09            | rs2776348     | 43086944           | 3.6E-08           |
| 13q34    | <i>ATP11A</i>         | rs1765871   | 113533651        | 4.9E-09            | rs1046793     | 113539894          | 1.8E-08           |
| 19p13.3  | <i>TICAM1/PLIN3</i>   | rs10425559  | 4837487          | 1.5E-08            | rs6510827     | 4830628            | 7.5E-08           |
| 6p21.33  | <i>HLA-B</i>          | rs1050529   | 31324615         | 1.8E-08            | rs2524043     | 31257012           | 4.5E-05           |
| 7p12.3   | <i>TNS3</i>           | rs7776701   | 47442633         | 2.1E-08            | rs834602      | 47446215           | 1.9E-06           |
| 22q12.1  | <i>TTC28</i>          | rs78097823  | 28648766         | 4.7E-08            | rs9625433     | 28620996           | 4.5E-05           |

For each index SNP from stage 1, we show the best association test result for a nearby SNP that was genotyped on our V3 and/or V4 arrays. "Imputed P-value" refers to the association (via logistic regression) between the stage 1 imputed index SNPs and BCC. "Genotyped P-value" refers to the association (via logistic regression) between stage 1 genotyped SNPs and BCC.

**Supplementary Table 4. Meta-analysis for 5 SNPs using subsets with high imputation quality in stage 2**

| SNP        | Region   | Gene         | Maj/<br>min | Stage 2               |           |              |      |       |      |                              | Meta-analysis          |           |              |                         |                       |
|------------|----------|--------------|-------------|-----------------------|-----------|--------------|------|-------|------|------------------------------|------------------------|-----------|--------------|-------------------------|-----------------------|
|            |          |              |             | <i>P</i>              | <i>OR</i> | 95% CI       | Affy | Illum | Omni | Avg<br><i>r</i> <sup>2</sup> | <i>P</i>               | <i>OR</i> | 95% CI       | <i>P</i> <sub>het</sub> | <i>I</i> <sup>2</sup> |
| rs12203592 | 6p25.3   | <i>IRF4</i>  | C/T         | 3.1×10 <sup>-10</sup> | 1.31      | (1.21, 1.43) | -    | 1.00  | 1.00 | 1.00                         | 1.5×10 <sup>-151</sup> | 1.48      | (1.44, 1.53) | 0.00                    | 88%                   |
| rs11170164 | 12q13.13 | <i>KRT5</i>  | C/T         | 3.4×10 <sup>-5</sup>  | 1.30      | (1.15, 1.47) | -    | 0.85  | 0.99 | 0.92                         | 1.2×10 <sup>-14</sup>  | 1.19      | (1.14, 1.24) | 0.13                    | 56%                   |
| rs10425559 | 19p13.3  | <i>PLIN3</i> | G/A         | 8.4×10 <sup>-1</sup>  | 0.99      | (0.93, 1.06) | -    | 0.88  | 1.00 | 0.94                         | 2.8×10 <sup>-8</sup>   | 0.93      | (0.91, 0.96) | 0.05                    | 74%                   |
| rs9267650  | 6p21.33  | <i>NEU1</i>  | A/T         | 3.6×10 <sup>-1</sup>  | 1.08      | (0.92, 1.27) | -    | 0.86  | 0.98 | 0.92                         | 1.5×10 <sup>-8</sup>   | 1.17      | (1.11, 1.24) | 0.29                    | 9%                    |
| rs12210050 | 6p25.3   | <i>EXOC2</i> | C/T         | 3.3×10 <sup>-5</sup>  | 1.17      | (1.09, 1.27) | 1.00 | 1.00  | -    | 1.00                         | 1.0×10 <sup>-49</sup>  | 1.25      | (1.21, 1.29) | 0.07                    | 69%                   |

For each SNP, we report rsID, genetic locus, gene, major and minor alleles, *P* value for stage 2, odds ratio (for stage 2 overall, along with 95% CI), average imputation *r*<sup>2</sup> (Affy Illumina, Omni, stage 2 overall), *P* value for meta-analysis, odds ratio (for meta-analysis overall, plus 95% CI), and *P*<sub>het</sub> and *I*<sup>2</sup> for meta-analysis. *P* values generated via logistic regression.

**Supplementary Table 5. Heterogeneity analysis results between stage 2 genotyping and imputation data**

| SNP        | Region  | Gene           | Maj/<br>Min | Imputation |                      |      |              |      |       |      |           | Genotyping |                      |      |              |           |       |
|------------|---------|----------------|-------------|------------|----------------------|------|--------------|------|-------|------|-----------|------------|----------------------|------|--------------|-----------|-------|
|            |         |                |             | MAF        | <i>P</i>             | OR   | 95% CI       | Affy | Illum | Omni | Avg $r^2$ | MAF        | <i>P</i>             | OR   | 95% CI       | $P_{het}$ | $I^2$ |
| rs12916300 | 15q13.1 | <i>HERC2</i>   | T/C         | 0.35       | $5.0 \times 10^{-4}$ | 0.84 | (0.76, 0.93) | 0.47 | 0.31  | 0.11 | 0.30      | 0.21       | $3.0 \times 10^{-1}$ | 0.91 | (0.75, 1.09) | 0.47      | 0%    |
| rs35407    | 5p13.2  | <i>SLC45A2</i> | G/A         | 0.05       | $7.4 \times 10^{-5}$ | 0.71 | (0.61, 0.84) | 0.60 | 0.58  | 0.33 | 0.50      | 0.02       | $8.2 \times 10^{-4}$ | 0.43 | (0.26, 0.71) | 0.06      | 72%   |

For each SNP, we report rsID, genetic locus, gene, major and minor alleles, minor allele frequency (MAF), *P* value and odds ratio (for stage 2 imputation, along with 95% CI), average imputation  $r^2$  (Affy, Illumina, Omni, stage 2 overall), MAF for genotyping, *P* value and odds ratio (for stage 2 genotyping, along with 95% CI), and  $P_{het}$  and  $I^2$ . *P* values generated via logistic regression.

**Supplementary Table 6. Effect sizes of 28 index SNPs in stage 1 stratified by age**

| SNP         | Gene                  | Age interval |         |         |          | P-value  |
|-------------|-----------------------|--------------|---------|---------|----------|----------|
|             |                       | (0,57]       | (57,65] | (65,72] | (72,72+] |          |
| rs12203592  | <i>IRF4</i>           | 0.509        | 0.395   | 0.434   | 0.275    | 1.30E-05 |
| rs1805007   | <i>MC1R</i>           | 0.406        | 0.345   | 0.392   | 0.200    | 0.0063   |
| rs214785    | <i>TGM3</i>           | -0.246       | -0.207  | -0.118  | -0.154   | 0.044    |
| rs35407     | <i>SLC45A2</i>        | 0.725        | 0.478   | 0.650   | 0.255    | 0.0065   |
| rs6059655   | <i>RALY</i>           | -0.264       | -0.284  | -0.197  | -0.187   | 0.061    |
| rs57142672  | <i>RCC2</i>           | 0.140        | 0.140   | 0.134   | 0.114    | 0.8      |
| rs73635312  | <i>GATA3</i>          | 0.257        | 0.223   | 0.111   | 0.145    | 0.038    |
| rs1126809   | <i>TYR</i>            | -0.133       | -0.175  | -0.102  | -0.114   | 0.18     |
| rs421284    | <i>CLPTM1L</i>        | 0.119        | 0.118   | 0.131   | 0.091    | 0.88     |
| rs2080303   | <i>ALS2CR12/CASP8</i> | 0.130        | 0.129   | 0.118   | 0.098    | 0.99     |
| rs61824911  | <i>RHOA</i>           | 0.189        | 0.092   | 0.072   | 0.126    | 0.067    |
| rs2116709   | <i>FOXP1/EIF4E3</i>   | -0.115       | -0.105  | -0.110  | -0.114   | 0.99     |
| rs12916300  | <i>OCA2/HERC2</i>     | 0.185        | 0.127   | 0.114   | 0.106    | 0.25     |
| rs141115006 | <i>RGS22</i>          | -0.127       | -0.123  | -0.132  | -0.182   | 0.66     |
| rs10810657  | <i>BNC2</i>           | -0.146       | -0.078  | -0.105  | -0.082   | 0.24     |
| rs10093547  | <i>ZFX4</i>           | 0.171        | 0.159   | 0.269   | 0.198    | 0.5      |
| rs191177147 | <i>LPP</i>            | 0.123        | 0.057   | 0.122   | 0.106    | 0.3      |
| rs9275642   | <i>HLA-DQB1/DQA2</i>  | -0.125       | -0.116  | -0.097  | -0.123   | 0.9      |
| rs7874604   | <i>CDKN2B</i>         | 0.078        | 0.076   | 0.111   | 0.115    | 0.78     |
| rs11170164  | <i>KRT5</i>           | 0.225        | 0.143   | 0.198   | 0.049    | 0.079    |
| rs73183643  | <i>CUX1</i>           | 0.141        | 0.128   | 0.061   | 0.084    | 0.42     |
| rs11993814  | <i>ZBTB10</i>         | -0.060       | -0.096  | -0.104  | -0.115   | 0.54     |
| rs2776353   | <i>LINC00111</i>      | -0.103       | -0.100  | -0.097  | -0.052   | 0.6      |
| rs1765871   | <i>ATP11A</i>         | -0.074       | -0.049  | -0.123  | -0.072   | 0.32     |
| rs10425559  | <i>TICAM1/PLIN3</i>   | 0.094        | 0.086   | 0.042   | 0.091    | 0.36     |
| rs1050529   | <i>HLA-B</i>          | -0.124       | -0.084  | -0.068  | -0.131   | 0.35     |
| rs7776701   | <i>TNS3</i>           | -0.132       | -0.086  | -0.057  | -0.033   | 0.048    |
| rs78097823  | <i>TTC28</i>          | 0.078        | 0.289   | 0.180   | 0.185    | 0.11     |

The table shows effect sizes (for each SNP reaching genome-wide significance in stage 1) computed in each age interval, as well as the *P* value for the test of genotype interaction with age interval. Stage 1 cohort was divided into four age intervals with similar effective sample sizes based on case and control sample counts. For all these association tests, the same covariates were used as in stage 1: age, sex, and five principal components. Thus, association tests within a specific age interval were still adjusted for age as a continuous covariate. Mean age for the 274,252 controls was 48.9 (SD 16.2); for the 12,945 cases, mean age was 65.5 (SD 11.5).

**Supplementary Table 7. Gender-based logistic regression results for 28 index SNPs in stage 1**

| SNP         | Gene                  | M <sub>effect</sub> | M <sub>SE</sub> | M <sub>P</sub> | F <sub>effect</sub> | F <sub>SE</sub> | F <sub>P</sub> | P     |
|-------------|-----------------------|---------------------|-----------------|----------------|---------------------|-----------------|----------------|-------|
| rs12203592  | <i>IRF4</i>           | 0.455               | 0.022           | 7.0E-88        | 0.366               | 0.023           | 6.0E-55        | 0.040 |
| rs1805007   | <i>MC1R</i>           | 0.374               | 0.031           | 4.1E-32        | 0.316               | 0.031           | 1.8E-22        | 0.286 |
| rs214785    | <i>TGM3</i>           | -0.167              | 0.023           | 1.2E-12        | -0.199              | 0.023           | 4.3E-17        | 0.213 |
| rs35407     | <i>SLC45A2</i>        | 0.505               | 0.071           | 1.9E-14        | 0.541               | 0.074           | 1.9E-15        | 0.751 |
| rs6059655   | <i>RALY</i>           | -0.279              | 0.032           | 1.3E-17        | -0.194              | 0.032           | 4.4E-09        | 0.088 |
| rs57142672  | <i>RCC2</i>           | 0.143               | 0.019           | 1.6E-13        | 0.125               | 0.020           | 2.1E-10        | 0.612 |
| rs73635312  | <i>GATA3</i>          | 0.227               | 0.028           | 2.2E-16        | 0.141               | 0.028           | 3.3E-07        | 0.047 |
| rs1126809   | <i>TYR</i>            | -0.128              | 0.020           | 2.8E-10        | -0.140              | 0.021           | 1.5E-11        | 0.521 |
| rs421284    | <i>CLPTM1L</i>        | 0.116               | 0.019           | 4.7E-10        | 0.120               | 0.019           | 3.0E-10        | 0.783 |
| rs2080303   | <i>ALS2CR12/CASP8</i> | 0.135               | 0.021           | 1.1E-10        | 0.105               | 0.021           | 8.2E-07        | 0.425 |
| rs61824911  | <i>RHOA</i>           | 0.139               | 0.021           | 9.1E-11        | 0.102               | 0.022           | 3.9E-06        | 0.300 |
| rs2116709   | <i>FOXP1/EIF4E3</i>   | -0.133              | 0.020           | 2.6E-11        | -0.087              | 0.020           | 1.7E-05        | 0.136 |
| rs12916300  | <i>OCA2/HERC2</i>     | 0.136               | 0.025           | 2.2E-08        | 0.133               | 0.025           | 9.3E-08        | 0.761 |
| rs141115006 | <i>RGS22</i>          | -0.140              | 0.026           | 7.7E-08        | -0.144              | 0.027           | 6.9E-08        | 0.819 |
| rs10810657  | <i>BNC2</i>           | -0.104              | 0.019           | 4.8E-08        | -0.102              | 0.020           | 2.0E-07        | 0.986 |
| rs10093547  | <i>ZFX4</i>           | 0.217               | 0.041           | 7.8E-08        | 0.191               | 0.042           | 2.8E-06        | 0.755 |
| rs191177147 | <i>LPP</i>            | 0.098               | 0.021           | 3.4E-06        | 0.111               | 0.021           | 2.2E-07        | 0.517 |
| rs9275642   | <i>HLA-DQB1/DQA2</i>  | -0.137              | 0.025           | 2.7E-08        | -0.100              | 0.025           | 5.7E-05        | 0.346 |
| rs7874604   | <i>CDKN2B</i>         | 0.088               | 0.020           | 1.5E-05        | 0.106               | 0.021           | 3.7E-07        | 0.591 |
| rs11170164  | <i>KRT5</i>           | 0.186               | 0.033           | 3.4E-08        | 0.133               | 0.034           | 1.4E-04        | 0.303 |
| rs73183643  | <i>CUX1</i>           | 0.094               | 0.023           | 3.2E-05        | 0.115               | 0.023           | 5.1E-07        | 0.391 |
| rs11993814  | <i>ZBTB10</i>         | -0.110              | 0.022           | 3.5E-07        | -0.083              | 0.022           | 1.6E-04        | 0.413 |
| rs2776353   | <i>LINC00111</i>      | -0.084              | 0.020           | 3.8E-05        | -0.097              | 0.021           | 3.1E-06        | 0.623 |
| rs1765871   | <i>ATP11A</i>         | -0.082              | 0.019           | 1.0E-05        | -0.080              | 0.019           | 2.6E-05        | 0.981 |
| rs10425559  | <i>TICAM1/PLIN3</i>   | 0.093               | 0.019           | 1.1E-06        | 0.067               | 0.020           | 6.3E-04        | 0.458 |
| rs1050529   | <i>HLA-B</i>          | -0.095              | 0.025           | 1.6E-04        | -0.116              | 0.026           | 6.4E-06        | 0.486 |
| rs7776701   | <i>TNS3</i>           | -0.074              | 0.019           | 7.2E-05        | -0.081              | 0.019           | 2.2E-05        | 0.711 |
| rs78097823  | <i>TTC28</i>          | 0.212               | 0.045           | 4.9E-06        | 0.166               | 0.046           | 4.0E-04        | 0.466 |

The table shows results from logistic regression models (for each SNP reaching genome-wide significance in stage 1) fit separately in male and female subsets of the stage 1 cohort, and a *P*-value from a likelihood ratio test for adding a gender by genotype interaction to the full model. “M” stands for male and “F” for female. The subscripts “SE” and “P” stand for “standard error” and “P-value”, respectively. Of the 274,252 controls, 54% were male; of the 12,945 cases, 52% were male.

**Supplementary Table 8. Replication of 16 previously confirmed and 5 previously reported BCC-associated loci**

| SNP         | Region   | Gene            | Maj/<br>min | MAF (avg<br>imputation $r^2$ ) | Stage 1                |           | Stage 2               |           | Meta-analysis          |           | Prior Studies         |           | Ref |
|-------------|----------|-----------------|-------------|--------------------------------|------------------------|-----------|-----------------------|-----------|------------------------|-----------|-----------------------|-----------|-----|
|             |          |                 |             |                                | <i>P</i>               | <i>OR</i> | <i>P</i>              | <i>OR</i> | <i>P</i>               | <i>OR</i> | <i>P</i>              | <i>OR</i> |     |
| rs12203592  | 6p25.3   | <i>IRF4*</i>    | C/T         | 0.17 (0.99)                    | $1.5 \times 10^{-138}$ | 1.51      | $1.5 \times 10^{-11}$ | 1.31      | $2.4 \times 10^{-152}$ | 1.48      | $1.6 \times 10^{-3}$  | 1.32      | a   |
| rs1805007   | 16q24.3  | <i>MC1R</i>     | C/T         | 0.07 (1.0)                     | $4.0 \times 10^{-52}$  | 1.41      | $1.9 \times 10^{-9}$  | 1.34      | $2.5 \times 10^{-63}$  | 1.40      | $4.3 \times 10^{-17}$ | 1.55      | 4   |
| rs12210050  | 6p25.3   | <i>EXOC2</i>    | C/T         | 0.17 (0.99)                    | $3.3 \times 10^{-45}$  | 1.27      | $4.5 \times 10^{-7}$  | 1.19      | $1.0 \times 10^{-51}$  | 1.25      | $9.9 \times 10^{-10}$ | 1.24      | 4   |
| rs214785    | 20p13    | <i>TGM3</i>     | T/C         | 0.18 (0.99)                    | $3.7 \times 10^{-28}$  | 1.2       | $1.2 \times 10^{-5}$  | 1.15      | $7.9 \times 10^{-33}$  | 1.19      | $5.5 \times 10^{-17}$ | 1.29      | 6   |
| rs35407     | 5p13.2   | <i>SLC45A2*</i> | G/A         | 0.04 (0.98)                    | $5.0 \times 10^{-28}$  | 0.6       | $7.4 \times 10^{-5}$  | 0.71      | $5.2 \times 10^{-27}$  | 0.63      | $1.6 \times 10^{-12}$ | 0.51      | b   |
| rs6059655   | 20q11.22 | <i>RALY*</i>    | G/A         | 0.07 (0.99)                    | $4.2 \times 10^{-24}$  | 1.26      | $2.8 \times 10^{-3}$  | 1.15      | $2.5 \times 10^{-26}$  | 1.24      | $1.2 \times 10^{-6}$  | 1.35      | c** |
| rs57142672  | 1p36.13  | <i>RCC2</i>     | A/G         | 0.34 (0.99)                    | $2.2 \times 10^{-22}$  | 1.14      | $3.4 \times 10^{-3}$  | 1.08      | $1.0 \times 10^{-23}$  | 1.13      | $4.4 \times 10^{-12}$ | 1.28      | 2   |
| rs73635312  | 10p14    | <i>GATA3</i>    | G/A         | 0.14 (1.0)                     | $2.4 \times 10^{-21}$  | 0.83      | $2.3 \times 10^{-4}$  | 0.87      | $2.8 \times 10^{-23}$  | 0.84      | $2.4 \times 10^{-16}$ | 0.74      | 7   |
| rs1126809   | 11q14.3  | <i>TYR*</i>     | G/A         | 0.28 (0.99)                    | $2.6 \times 10^{-20}$  | 1.14      | $1.3 \times 10^{-1}$  | 1.04      | $2.5 \times 10^{-19}$  | 1.12      | $6.1 \times 10^{-4}$  | 1.14      | c   |
| rs421284    | 5p15.33  | <i>CLPTM1L</i>  | T/C         | 0.44 (0.99)                    | $9.1 \times 10^{-19}$  | 0.89      | $2.8 \times 10^{-2}$  | 0.94      | $1.1 \times 10^{-18}$  | 0.90      | $3.7 \times 10^{-12}$ | 0.80      | 3   |
| rs2080303   | 2q33.1   | <i>ALS2CR12</i> | C/T         | 0.32 (0.89)                    | $1.1 \times 10^{-15}$  | 1.13      | $1.9 \times 10^{-4}$  | 1.11      | $7.4 \times 10^{-19}$  | 1.13      | $1.5 \times 10^{-9}$  | 1.15      | 7   |
| rs61824911  | 1q42.13  | <i>RHOU</i>     | A/G         | 0.28 (0.90)                    | $3.7 \times 10^{-15}$  | 1.13      | $1.4 \times 10^{-1}$  | 1.05      | $1.1 \times 10^{-14}$  | 1.11      | $5.9 \times 10^{-12}$ | 1.28      | 2   |
| rs12916300  | 15q13.1  | <i>OCA2*</i>    | T/C         | 0.29 (0.79)                    | $1.4 \times 10^{-14}$  | 0.87      | $5.0 \times 10^{-4}$  | 0.84      | $8.2 \times 10^{-17}$  | 0.87      | $1 \times 10^{-2}$    | 0.70      | a   |
| rs141115006 | 8q22.2   | <i>RGS22</i>    | C/T         | 0.17 (0.95)                    | $2.3 \times 10^{-14}$  | 0.87      | $5.1 \times 10^{-3}$  | 0.91      | $2.0 \times 10^{-15}$  | 0.88      | $8.7 \times 10^{-13}$ | 0.77      | 6   |
| rs10093547  | 8q21.11  | <i>ZFHX4</i>    | T/G         | 0.06 (0.95)                    | $9.6 \times 10^{-13}$  | 0.82      | $2.7 \times 10^{-4}$  | 0.82      | $4.6 \times 10^{-15}$  | 0.82      | $3.5 \times 10^{-12}$ | 0.70      | 7   |
| rs7874604   | 9p21.3   | <i>CDKN2B</i>   | T/C         | 0.46 (0.84)                    | $3.0 \times 10^{-11}$  | 0.91      | $3.8 \times 10^{-3}$  | 0.92      | $4.5 \times 10^{-13}$  | 0.91      | $3.0 \times 10^{-10}$ | 0.83      | 6   |
| rs11170164  | 12q13.13 | <i>KRT5</i>     | C/T         | 0.08 (1.0)                     | $4.7 \times 10^{-11}$  | 1.17      | $3.7 \times 10^{-6}$  | 1.26      | $1.1 \times 10^{-15}$  | 1.19      | $9.3 \times 10^{-9}$  | 1.29      | 7   |
| rs78378222  | 17p13.1  | <i>TP53</i>     | T/G         | 0.01 (0.87)                    | $3.5 \times 10^{-8}$   | 1.39      | $4.0 \times 10^{-3}$  | 1.54      | $1.8 \times 10^{-10}$  | 1.41      | $2.2 \times 10^{-20}$ | 2.16      | 5   |
| rs157935    | 7q32.3   | <i>KLF14</i>    | T/G         | 0.29 (1.0)                     | $6.5 \times 10^{-5}$   | 0.94      | $2.3 \times 10^{-2}$  | 0.94      | $4.5 \times 10^{-6}$   | 0.94      | $8.5 \times 10^{-11}$ | 0.81      | 6   |
| rs57244888  | 2p24.3   | <i>MYCN</i>     | T/C         | 0.12 (0.92)                    | $6.6 \times 10^{-5}$   | 0.92      | $4.4 \times 10^{-1}$  | 0.97      | $1.2 \times 10^{-4}$   | 0.93      | $4.7 \times 10^{-12}$ | 0.76      | 7   |
| rs7335046   | 13q32.3  | <i>UBAC2</i>    | C/G         | 0.12 (0.99)                    | $5.6 \times 10^{-1}$   | 1.01      | $2.5 \times 10^{-4}$  | 1.15      | $2.6 \times 10^{-2}$   | 1.04      | $2.9 \times 10^{-8}$  | 1.26      | 4   |

16 loci previously confirmed as associated with BCC via prior GWAS ( $P < 5 \times 10^{-8}$ ) are listed, 12 of which independently reached genome-wide significance ( $P < 5 \times 10^{-8}$ ) in this study. 5 additional BCC loci, previously reported via candidate gene studies, are indicated via asterisks; these loci are pigmentation-related, and all 5 reached genome-wide significance in this study. We report the most significant SNP at each locus based on stage 1 data. Additionally, we report major allele, minor allele, minor allele frequency (MAF) as calculated from stage 1 data, average imputation  $r^2$  (a measure of imputation quality) for stage 1, and odds ratio (OR) with *P* value for each stage, calculated with respect to the minor allele via logistic regression. The right-most 3 columns list *P* value and OR from prior publications for each locus, along with corresponding reference number ("Ref") as listed in main text. Statistics for effect heterogeneity ( $P_{het}$  and  $I^2$ ) are included in Supplementary Table 9.

a. Han, J. *et al.* A germline variant in the interferon regulatory factor 4 gene as a novel skin cancer risk locus. *Cancer Res.* 71, 1533–1539 (2011).

b. Stacey, S. N. *et al.* New common variants affecting susceptibility to basal cell carcinoma. *Nat. Genet.* 41, 909–914 (2009).

c. Gudbjartsson, D. F. *et al.* ASIP and TYR pigmentation variants associate with cutaneous melanoma and basal cell carcinoma. *Nat. Genet.* 40, 886–891 (2008).

\*\*This publication reports *P* value and OR with respect to a two-SNP haplotype, rs1015362[G] and rs4911414[T], at the *RALY-ASIP* locus

**Supplementary Table 9. Imputation and effect heterogeneity statistics for SNPs at previously reported loci**

| SNP         | Gene            | Maj/<br>min | Stage 1 |           |           | Stage 2 |            |             |            | Meta-analysis     |           |       |
|-------------|-----------------|-------------|---------|-----------|-----------|---------|------------|-------------|------------|-------------------|-----------|-------|
|             |                 |             | MAF     | avg $r^2$ | min $r^2$ | MAF     | Affy $r^2$ | Illum $r^2$ | Omni $r^2$ | Overall avg $r^2$ | $P_{net}$ | $I^2$ |
| rs12203592  | <i>IRF4*</i>    | C/T         | 0.17    | 0.99      | 0.98      | 0.17    | 0.32       | 1.00        | 1.00       | 0.77              | 0.00      | 91%   |
| rs1805007   | <i>MC1R</i>     | C/T         | 0.07    | 1.00      | 1.00      | 0.07    | 1.00       | 0.82        | 0.88       | 0.90              | 0.32      | 0%    |
| rs12210050  | <i>EXOC2</i>    | C/T         | 0.17    | 0.99      | 0.98      | 0.17    | 1.00       | 1.00        | 0.54       | 0.84              | 0.13      | 56%   |
| rs214785    | <i>TGM3</i>     | T/C         | 0.18    | 0.99      | 0.98      | 0.18    | 1.00       | 0.99        | 0.99       | 0.99              | 0.27      | 17%   |
| rs35407     | <i>SLC45A2*</i> | G/A         | 0.04    | 0.98      | 0.88      | 0.05    | 0.60       | 0.58        | 0.33       | 0.50              | 0.06      | 71%   |
| rs6059655   | <i>RALY*</i>    | G/A         | 0.07    | 0.99      | 0.98      | 0.08    | 0.97       | 0.98        | 0.99       | 0.98              | 0.07      | 70%   |
| rs57142672  | <i>RCC2</i>     | A/G         | 0.34    | 0.99      | 0.98      | 0.35    | 0.98       | 0.98        | 0.98       | 0.98              | 0.06      | 71%   |
| rs73635312  | <i>GATA3</i>    | G/A         | 0.14    | 1.00      | 1.00      | 0.14    | 0.97       | 1.00        | 0.99       | 0.98              | 0.27      | 16%   |
| rs1126809   | <i>TYR*</i>     | G/A         | 0.28    | 0.99      | 0.98      | 0.27    | 0.98       | 0.97        | 0.96       | 0.97              | 0.00      | 88%   |
| rs421284    | <i>CLPTM1L</i>  | T/C         | 0.44    | 0.99      | 0.99      | 0.44    | 0.99       | 0.98        | 0.99       | 0.99              | 0.03      | 78%   |
| rs2080303   | <i>ALS2CR12</i> | C/T         | 0.32    | 0.89      | 0.88      | 0.32    | 0.88       | 0.88        | 0.88       | 0.88              | 0.71      | 0%    |
| rs61824911  | <i>RHOA</i>     | A/G         | 0.28    | 0.90      | 0.89      | 0.27    | 0.89       | 0.88        | 0.88       | 0.88              | 0.03      | 80%   |
| rs12916300  | <i>OCA2*</i>    | T/C         | 0.29    | 0.79      | 0.75      | 0.35    | 0.47       | 0.31        | 0.11       | 0.30              | 0.40      | 0%    |
| rs141115006 | <i>RGS22</i>    | C/T         | 0.17    | 0.95      | 0.92      | 0.17    | 0.98       | 0.92        | 0.96       | 0.96              | 0.27      | 17%   |
| rs10093547  | <i>ZFHX4</i>    | T/G         | 0.06    | 0.95      | 0.93      | 0.07    | 0.93       | 0.93        | 0.94       | 0.93              | 0.95      | 0%    |
| rs7874604   | <i>CDKN2B</i>   | T/C         | 0.46    | 0.84      | 0.82      | 0.45    | 0.84       | 0.81        | 0.82       | 0.82              | 0.63      | 0%    |
| rs11170164  | <i>KRT5</i>     | C/T         | 0.08    | 1.00      | 0.99      | 0.08    | 0.73       | 0.85        | 0.99       | 0.86              | 0.19      | 42%   |
| rs78378222  | <i>TP53</i>     | T/G         | 0.01    | 0.87      | 0.82      | 0.01    | 0.79       | 0.79        | 0.79       | 0.79              | 0.53      | 0%    |
| rs157935    | <i>KLF14</i>    | T/G         | 0.29    | 1.00      | 1.00      | 0.30    | 0.97       | 1.00        | 1.00       | 0.99              | 0.85      | 0%    |
| rs57244888  | <i>MYCN</i>     | T/C         | 0.12    | 0.92      | 0.90      | 0.12    | 0.99       | 0.88        | 0.91       | 0.93              | 0.23      | 30%   |
| rs7335046   | <i>UBAC2</i>    | C/G         | 0.12    | 0.99      | 0.97      | 0.12    | 0.98       | 0.98        | 0.99       | 0.98              | 0.00      | 89%   |

These loci are all previously reported in prior BCC GWAS publications (16 loci) or candidate gene studies (5 loci, asterisks). We report genetic context, major and minor alleles, stage 1 minor allele frequency (MAF), stage 1 average imputation  $r^2$  (avg  $r^2$ ), stage 1 minimum imputation  $r^2$ , stage 2 MAF, stage 2 average imputation  $r^2$  for each genotyping platform (Affy, Illumina, Omni) and overall, and  $P$  value ( $P_{net}$ ) and  $I^2$  for effect heterogeneity pertaining to meta-analysis of combined stage 1-stage 2 data.

**Supplementary Table 10. Meta-analysis for rs12913832 and rs1800407**

| SNP        | Region  | Gene              | Maj/<br>min | Stage 1 |                       |      |              |           | Stage 2 |                      |      |              |      | Meta-analysis |      |           |                       |      |              |           |       |
|------------|---------|-------------------|-------------|---------|-----------------------|------|--------------|-----------|---------|----------------------|------|--------------|------|---------------|------|-----------|-----------------------|------|--------------|-----------|-------|
|            |         |                   |             | MAF     | <i>P</i>              | OR   | 95% CI       | Avg $r^2$ | MAF     | <i>P</i>             | OR   | 95% CI       | Affy | Illum         | Omni | Avg $r^2$ | <i>P</i>              | OR   | 95% CI       | $P_{het}$ | $I^2$ |
| rs12913832 | 15q13.1 | <i>OCA2/HERC2</i> | G/A         | 0.28    | $1.0 \times 10^{-11}$ | 0.87 | (0.84, 0.91) | 1.00      | 0.26    | $6.2 \times 10^{-4}$ | 0.89 | (0.83, 0.95) | 0.99 | 1.00          | NA   | 1.00      | $4.4 \times 10^{-14}$ | 0.88 | (0.85, 0.91) | 0.73      | 0%    |
| rs1800407  | 15q13.1 | <i>OCA2</i>       | C/T         | 0.07    | $4.1 \times 10^{-8}$  | 1.14 | (1.09, 1.20) | 1.00      | 0.08    | $2.0 \times 10^{-1}$ | 1.12 | (0.94, 1.34) | NA   | NA            | 1.00 | 1.00      | $3.2 \times 10^{-8}$  | 1.14 | (1.09, 1.19) | 0.46      | 0%    |

*OCA2/HERC2* rs12913832 is in modest linkage disequilibrium with rs12916300 ( $r^2=0.66$ ,  $D'=0.93$ ). 15q13.1 (rs1800407; *OCA2* R419Q) is a previously confirmed pigmentation-related locus. For each SNP, we report rsID, genetic locus, gene, major and minor alleles, stage 1 minor allele frequency (MAF), *P* value for stage 1, odds ratio (for stage 1 overall, plus 95% CI), average imputation  $r^2$  (for stage 1), MAF for stage 2, *P* value for stage 2, odds ratio (for stage 2 overall, plus 95% CI), average imputation  $r^2$  (for Affy, Illumina, Omni, stage 2 overall), *P* value for meta-analysis, odds ratio (for meta-analysis overall, plus 95% CI), and  $P_{het}$  and  $I^2$  for meta-analysis. *P* values generated via logistic regression.



**Supplementary Table 11. Meta-analysis for rs16891982**

| SNP        | Region | Gene           | Maj/<br>min | Stage 1 |                       |           |              |           | Stage 2 |                      |           |              |      | Meta-analysis |      |           |                       |           |              |           |       |
|------------|--------|----------------|-------------|---------|-----------------------|-----------|--------------|-----------|---------|----------------------|-----------|--------------|------|---------------|------|-----------|-----------------------|-----------|--------------|-----------|-------|
|            |        |                |             | MAF     | <i>P</i>              | <i>OR</i> | 95% CI       | Avg $r^2$ | MAF     | <i>P</i>             | <i>OR</i> | 95% CI       | Affy | Illum         | Omni | Avg $r^2$ | <i>P</i>              | <i>OR</i> | 95% CI       | $P_{het}$ | $I^2$ |
| rs16891982 | 5p13.2 | <i>SLC45A2</i> | G/C         | 0.05    | $1.7 \times 10^{-25}$ | 0.59      | (0.53, 0.65) | 1.00      | 0.07    | $1.2 \times 10^{-4}$ | 0.75      | (0.64, 0.87) | 0.56 | 0.58          | 0.32 | 0.49      | $5.7 \times 10^{-24}$ | 0.64      | (0.58, 0.70) | 0.01      | 84%   |

rs16891982 (Phe374Leu) in *SLC45A2* is non-synonymous exonic SNP. rs16891982 is in modest LD with rs35407 ( $r^2=0.33$ ,  $D'=1$ ). For each SNP, we report rsID, genetic locus, gene, major and minor alleles, stage 1 minor allele frequency (MAF), *P* value for stage 1, odds ratio (for stage 1 overall, plus 95% CI), average imputation  $r^2$  (for stage 1), MAF for stage 2, *P* value for stage 2, odds ratio (for stage 2 overall, plus 95% CI), average imputation  $r^2$  (for Affy, Illumina, Omni, stage 2 overall), *P* value for meta-analysis, odds ratio (for meta-analysis overall, plus 95% CI), and  $P_{het}$  and  $I^2$  for meta-analysis. *P* values generated via logistic regression.

**Supplementary Table 12. Mutually adjusted analysis for rs12203592 and rs12210050 in region 6p25.3 using subsets with high imputation quality in stage 2**

| SNP                     | Region | Gene         | Maj/<br>Min | $r^2$ | Independent analysis results <sup>c</sup> |      |             | Mutually adjusted analysis results <sup>c</sup> |      |             |
|-------------------------|--------|--------------|-------------|-------|-------------------------------------------|------|-------------|-------------------------------------------------|------|-------------|
|                         |        |              |             |       | $P$                                       | OR   | 95% CI      | $P$                                             | OR   | 95% CI      |
| rs12203592 <sup>a</sup> | 6p25.3 | <i>IRF4</i>  | C/T         | 0.997 | $4.3 \times 10^{-4}$                      | 1.24 | (1.10,1.40) | $9.9 \times 10^{-3}$                            | 1.21 | (1.05,1.38) |
| rs12210050 <sup>b</sup> | 6p25.3 | <i>EXOC2</i> | C/T         | 0.996 | $1.1 \times 10^{-2}$                      | 1.17 | (1.04,1.32) | $3.7 \times 10^{-1}$                            | 1.07 | (0.93,1.22) |

The second signal in the 6p25.3 region peaked at rs12210050, located near *EXOC2*; this SNP was previously reported to be associated with BCC risk and replicated in our study. This SNP is not in strong linkage disequilibrium with the top SNP in 6p25.3, rs12203592 ( $r^2=0.26$ ,  $D'=0.51$ ). We performed a conditional analysis mutually adjusting for both SNPs in stage 2, using a high-quality Illumina dataset ( $R^2 > 0.99$  for both SNPs). The results demonstrate that rs12203592 remained significant but rs12210050 did not. For each SNP, we report rsID, genetic locus, gene, major and minor alleles, stage 2 average imputation  $r^2$ , and  $P$  value and OR (along with 95% CI) for independent analysis results and mutually adjusted analysis results, generated via logistic regression.

- a. Mutually adjusted analysis adjusted by SNP rs12210050
- b. Mutually adjusted analysis adjusted by top SNP rs12203592
- c. Analysis was generated using subsets with high imputation quality in stage 2

**Supplementary Table 13. Imputation and effect heterogeneity statistics for 14 novel genome-wide significant SNPs**

| SNP         | Gene             | Maj/<br>min | Stage 1 |           |           | Stage 2           |            |             |            | Meta-analysis     |           |           |
|-------------|------------------|-------------|---------|-----------|-----------|-------------------|------------|-------------|------------|-------------------|-----------|-----------|
|             |                  |             | MAF     | avg $r^2$ | min $r^2$ | MAF               | Affy $r^2$ | Illum $r^2$ | Omni $r^2$ | Overall avg $r^2$ | $P_{net}$ | $I^2$ (%) |
| rs2116709   | <i>FOXP1</i>     | A/T         | 0.40    | 0.91      | 0.90      | 0.41              | 0.90       | 0.89        | 0.90       | 0.89              | 0.58      | 0%        |
| rs10810657  | <i>BNC2</i>      | A/T         | 0.41    | 0.98      | 0.97      | 0.40              | 0.98       | 0.97        | 0.97       | 0.97              | 0.89      | 0%        |
| rs191177147 | <i>LPP</i>       | G/T         | 0.39    | 0.80      | 0.79      | 0.39              | 0.75       | 0.78        | 0.78       | 0.77              | 0.81      | 0%        |
| rs9275642   | <i>HLA-DQA2</i>  | C/T         | 0.21    | 0.89      | 0.81      | 0.22 <sup>a</sup> | a          | a           | a          | a                 | 1.00      | 0%        |
| rs73183643  | <i>CUX1</i>      | G/A         | 0.24    | 0.96      | 0.93      | 0.24              | 0.98       | 0.94        | 0.92       | 0.94              | 0.76      | 0%        |
| rs11993814  | <i>ZBTB10</i>    | C/T         | 0.26    | 1.00      | 0.98      | 0.25              | 0.98       | 0.99        | 1.00       | 0.99              | 0.26      | 21%       |
| rs2776353   | <i>LINC00111</i> | A/T         | 0.32    | 0.96      | 0.93      | 0.32              | 0.91       | 0.91        | 0.96       | 0.93              | 0.85      | 0%        |
| rs10425559  | <i>PLIN3</i>     | G/A         | 0.40    | 0.97      | 0.89      | 0.40              | 0.28       | 0.88        | 1.00       | 0.72              | 0.05      | 74%       |
| rs1050529   | <i>HLA-B</i>     | C/T         | 0.25    | 0.71      | 0.69      | 0.19 <sup>b</sup> | b          | b           | b          | b                 | 0.91      | 0%        |
| rs7776701   | <i>TNS3</i>      | C/T         | 0.48    | 0.98      | 0.97      | 0.48              | 0.98       | 0.98        | 0.98       | 0.98              | 0.04      | 77%       |
| rs9267650   | <i>NEU1</i>      | A/T         | 0.05    | 0.98      | 0.98      | 0.05              | 0.66       | 0.86        | 0.98       | 0.83              | 0.26      | 23%       |
| rs7907606   | <i>OBFC1</i>     | T/G         | 0.17    | 0.96      | 0.92      | 0.17              | 0.97       | 0.92        | 0.97       | 0.96              | 0.63      | 0%        |
| rs4710154   | <i>MIR3939</i>   | A/T         | 0.32    | 0.93      | 0.93      | 0.31              | 0.91       | 0.92        | 0.92       | 0.91              | 0.53      | 0%        |
| rs2294214   | <i>CASC15</i>    | A/C         | 0.32    | 0.95      | 0.93      | 0.30              | 0.82       | 0.95        | 0.74       | 0.84              | 0.07      | 69%       |

SNPs that met genome-wide significance ( $P < 5 \times 10^{-8}$ , via logistic regression) in stage 1 and/or overall meta-analysis are listed. Additionally, we report genetic context, major and minor alleles, stage 1 minor allele frequency (MAF), stage 1 average imputation  $r^2$  (avg  $r^2$ ), stage 1 minimum imputation  $r^2$ , stage 2 MAF, stage 2 average imputation  $r^2$  for each genotyping platform (Affy, Illumina, Omni) and overall, and  $P$  value ( $P_{net}$ ) and  $I^2$  for effect heterogeneity pertaining to meta-analysis of combined stage 1-stage 2 data.

a. Due to low imputation quality in stage 2 ( $r^2 < 0.3$ ), genotyping results are utilized for this result.

b. Due to low imputation quality in stage 2 ( $r^2 < 0.3$ ), genotyping results are utilized for this result. rs1050529 is located at HLA region, harboring high genomic diversity. rs9266772 is used as proxy SNP for rs1050529 ( $r^2=0.569, D'=0.771$ ).

**Supplementary Table 14. Adjustment analysis for pigmentation phenotype in stage 2.**

| SNP         | Region   | Gene             | Maj/<br>min | $\beta$ | SE    | <i>P</i> value | Adj $\beta^a$ | Adj SE <sup>a</sup> | Adj <i>P</i> value <sup>a</sup> | Note |
|-------------|----------|------------------|-------------|---------|-------|----------------|---------------|---------------------|---------------------------------|------|
| rs12203592  | 6p25.3   | <i>IRF4</i>      | C/T         | 0.269   | 0.04  | 1.5E-11        | 0.281         | 0.045               | 3.1E-10                         | PC   |
| rs1805007   | 16q24.3  | <i>MC1R</i>      | C/T         | 0.291   | 0.049 | 1.9E-09        | 0.223         | 0.054               | 3.0E-05                         | PC   |
| rs12210050  | 6p25.3   | <i>EXOC2</i>     | C/T         | 0.177   | 0.035 | 4.5E-07        | 0.158         | 0.038               | 3.7E-05                         | PC   |
| rs214785    | 20p13    | <i>TGM3</i>      | T/C         | -0.143  | 0.033 | 1.2E-05        | 0.131         | 0.035               | 2.1E-04                         | PC   |
| rs35407     | 5p13.2   | <i>SLC45A2</i>   | G/A         | -0.336  | 0.085 | 7.4E-05        | -0.189        | 0.09                | 3.5E-02                         | PC   |
| rs6059655   | 20q11.22 | <i>RALY</i>      | G/A         | 0.14    | 0.047 | 2.8E-03        | 0.035         | 0.051               | 5.0E-01                         | PC   |
| rs57142672  | 1p36.13  | <i>RCC2</i>      | A/G         | -0.078  | 0.027 | 3.4E-03        | 0.1           | 0.029               | 4.8E-04                         | PC   |
| rs73635312  | 10p14    | <i>GATA3</i>     | G/A         | -0.139  | 0.038 | 2.3E-04        | -0.158        | 0.041               | 1.1E-04                         | PC   |
| rs1126809   | 11q14.3  | <i>TYR</i>       | G/A         | 0.043   | 0.029 | 1.3E-01        | 0.018         | 0.031               | 5.5E-01                         | PC   |
| rs421284    | 5p15.33  | <i>CLPTM1L</i>   | T/C         | 0.057   | 0.026 | 2.8E-02        | -0.072        | 0.028               | 1.0E-02                         | PC   |
| rs2080303   | 2q33.1   | <i>ALS2CR12</i>  | C/T         | 0.108   | 0.029 | 1.9E-04        | 0.123         | 0.031               | 8.3E-05                         | PC   |
| rs61824911  | 1q42.13  | <i>RHOA</i>      | A/G         | -0.045  | 0.031 | 1.4E-01        | 0.056         | 0.033               | 9.4E-02                         | PC   |
| rs12916300  | 15q13.1  | <i>OCA2</i>      | T/C         | 0.18    | 0.052 | 5.0E-04        | -0.102        | 0.054               | 5.6E-02                         | PC   |
| rs141115006 | 8q22.2   | <i>RGS22</i>     | C/T         | -0.098  | 0.035 | 5.1E-03        | -0.079        | 0.038               | 3.7E-02                         | PC   |
| rs10093547  | 8q21.11  | <i>ZFX4</i>      | T/G         | 0.2     | 0.055 | 2.7E-04        | -0.254        | 0.06                | 2.3E-05                         | PC   |
| rs7874604   | 9p21.3   | <i>CDKN2B</i>    | T/C         | 0.081   | 0.028 | 3.8E-03        | -0.053        | 0.03                | 8.1E-02                         | PC   |
| rs11170164  | 12q13.13 | <i>KRT5</i>      | C/T         | 0.232   | 0.05  | 3.7E-06        | 0.224         | 0.054               | 3.7E-05                         | PC   |
| rs78378222  | 17p13.1  | <i>TP53</i>      | T/G         | -0.433  | 0.15  | 4.0E-03        | 0.36          | 0.14                | 1.0E-02                         | PC   |
| rs157935    | 7q32.3   | <i>KLF14</i>     | T/G         | 0.064   | 0.028 | 2.3E-02        | -0.066        | 0.031               | 3.0E-02                         | PC   |
| rs57244888  | 2p24.3   | <i>MYCN</i>      | T/C         | 0.031   | 0.041 | 4.4E-01        | -0.009        | 0.044               | 8.4E-01                         | PC   |
| rs7335046   | 13q32.3  | <i>UBAC2</i>     | C/G         | -0.139  | 0.038 | 2.5E-04        | 0.134         | 0.041               | 9.5E-04                         | PC   |
| rs2116709   | 3p13     | <i>FOXP1</i>     | A/T         | 0.094   | 0.027 | 6.1E-04        | -0.094        | 0.03                | 1.4E-03                         | N    |
| rs10810657  | 9p22.2   | <i>BNC2</i>      | A/T         | 0.107   | 0.027 | 5.7E-05        | -0.085        | 0.029               | 3.0E-03                         | N    |
| rs191177147 | 3q28     | <i>LPP</i>       | G/T         | 0.097   | 0.03  | 1.0E-03        | 0.083         | 0.032               | 9.1E-03                         | N    |
| rs9275642   | 6p21.32  | <i>HLA-DQA2</i>  | C/T         | -0.212  | 0.096 | 2.7E-02        | -2.812        | 1.406               | 4.6E-02                         | N    |
| rs73183643  | 7q22.1   | <i>CUX1</i>      | G/A         | -0.115  | 0.031 | 2.3E-04        | -0.132        | 0.034               | 8.8E-05                         | N    |
| rs11993814  | 8q21.13  | <i>ZBTB10</i>    | C/T         | -0.06   | 0.03  | 4.5E-02        | -0.083        | 0.032               | 9.5E-03                         | N    |
| rs2776353   | 21q22.3  | <i>LINC00111</i> | A/T         | 0.096   | 0.029 | 7.7E-04        | -0.106        | 0.031               | 5.5E-04                         | N    |
| rs10425559  | 19p13.3  | <i>PLIN3</i>     | G/A         | -0.007  | 0.035 | 8.4E-01        | 0.004         | 0.035               | 9.0E-01                         | N    |
| rs1050529   | 6p21.33  | <i>HLA-B</i>     | C/T         | -0.118  | 0.107 | 2.7E-01        | -0.312        | 0.179               | 8.2E-02                         | N    |
| rs7776701   | 7p12.3   | <i>TNS3</i>      | C/T         | -0.017  | 0.026 | 5.1E-01        | -0.005        | 0.028               | 8.7E-01                         | N    |
| rs9267650   | 6p21.3   | <i>NEU1</i>      | A/T         | -0.086  | 0.066 | 2.0E-01        | 0.076         | 0.072               | 2.9E-01                         | N    |
| rs7907606   | 10q24.3  | <i>OBFC1</i>     | T/G         | -0.077  | 0.034 | 2.4E-02        | 0.073         | 0.037               | 4.9E-02                         | N    |
| rs4710154   | 6q27     | <i>MIR3939</i>   | A/T         | -0.058  | 0.028 | 4.3E-02        | 0.068         | 0.031               | 2.7E-02                         | N    |
| rs2294214   | 6p22.3   | <i>CASC15</i>    | A/C         | -0.12   | 0.03  | 5.9E-05        | 0.135         | 0.032               | 2.9E-05                         | N    |

<sup>a</sup> Analysis was adjusted by hair color, tanning ability during adolescence, and number of blistering sunburns in the logistic regression association model. “ $\beta$ ” refers to effect size, “SE” to standard error, “Adj” to adjusted, “PC” to previously confirmed susceptibility locus, and “N” to novel susceptibility locus.

**Supplementary Table 15. Interaction analysis for hair color, number of sunburns, tanning ability, and UVB exposure in stage 2.**

| SNP                | Region      | Gene             | Maj/min    | Stage 2          |                         |                      |                  |                  | Note     |
|--------------------|-------------|------------------|------------|------------------|-------------------------|----------------------|------------------|------------------|----------|
|                    |             |                  |            | <i>P</i> for SNP | Int <i>P</i> hair color | Int <i>P</i> sunburn | Int <i>P</i> tan | Int <i>P</i> UVB |          |
| rs12203592         | 6p25.3      | <i>IRF4</i>      | C/T        | 1.5E-11          | 0.0147                  | 0.1269               | 0.0231           | 0.1574           | PC       |
| rs1805007          | 16q24.3     | <i>MC1R</i>      | C/T        | 1.9E-09          | 0.2617                  | 0.0553               | 0.4527           | 0.8077           | PC       |
| rs12210050         | 6p25.3      | <i>EXOC2</i>     | C/T        | 4.5E-07          | 0.34                    | 0.9371               | 0.2096           | 0.5712           | PC       |
| rs214785           | 20p13       | <i>TGM3</i>      | T/C        | 1.2E-05          | 0.6537                  | 0.1576               | 0.7358           | 0.4297           | PC       |
| rs35407            | 5p13.2      | <i>SLC45A2</i>   | G/A        | 7.4E-05          | 0.7456                  | 0.7548               | 0.9102           | 0.0587           | PC       |
| rs6059655          | 20q11.22    | <i>RALY</i>      | G/A        | 2.8E-03          | 0.0894                  | 0.5644               | 0.5252           | 0.1697           | PC       |
| rs57142672         | 1p36.13     | <i>RCC2</i>      | A/G        | 3.4E-03          | 0.9476                  | 0.6069               | 0.3238           | 0.5949           | PC       |
| rs73635312         | 10p14       | <i>GATA3</i>     | G/A        | 2.3E-04          | 0.5108                  | 0.6284               | 0.8583           | 0.3658           | PC       |
| rs1126809          | 11q14.3     | <i>TYR</i>       | G/A        | 1.3E-01          | 0.5733                  | 0.1951               | 0.0711           | 0.06             | PC       |
| rs421284           | 5p15.33     | <i>CLPTM1L</i>   | T/C        | 2.8E-02          | 0.1991                  | 0.2146               | 0.4098           | 0.8742           | PC       |
| rs2080303          | 2q33.1      | <i>ALS2CR12</i>  | C/T        | 1.9E-04          | 0.9261                  | 0.7925               | 0.0471           | 0.912            | PC       |
| rs61824911         | 1q42.13     | <i>RHOA</i>      | A/G        | 1.4E-01          | 0.5005                  | 0.3275               | 0.8657           | 0.4982           | PC       |
| rs12916300         | 15q13.1     | <i>OCA2</i>      | T/C        | 5.0E-04          | 0.1479                  | 0.1949               | 0.148            | 0.4302           | PC       |
| rs141115006        | 8q22.2      | <i>RGS22</i>     | C/T        | 5.1E-03          | 0.9034                  | 0.6912               | 0.074            | 0.8917           | PC       |
| rs10093547         | 8q21.11     | <i>ZFH4</i>      | T/G        | 2.7E-04          | 0.0971                  | 0.811                | 0.859            | 0.4303           | PC       |
| rs7874604          | 9p21.3      | <i>CDKN2B</i>    | T/C        | 3.8E-03          | 0.1196                  | 0.0281               | 0.4439           | 0.2258           | PC       |
| rs11170164         | 12q13.13    | <i>KRT5</i>      | C/T        | 3.7E-06          | 0.9566                  | 0.1993               | 0.9099           | 0.6325           | PC       |
| rs78378222         | 17p13.1     | <i>TP53</i>      | T/G        | 4.0E-03          | 0.8911                  | 0.7125               | 0.0881           | 0.1847           | PC       |
| rs157935           | 7q32.3      | <i>KLF14</i>     | T/G        | 2.3E-02          | 0.4197                  | 0.7012               | 0.6323           | 0.5127           | PC       |
| rs57244888         | 2p24.3      | <i>MYCN</i>      | T/C        | 4.4E-01          | 0.8525                  | 0.9742               | 0.5191           | 0.8522           | PC       |
| rs7335046          | 13q32.3     | <i>UBAC2</i>     | C/G        | 2.5E-04          | 0.4801                  | 0.7122               | 0.8656           | 0.1632           | PC       |
| rs2116709          | 3p13        | <i>FOXP1</i>     | A/T        | 6.1E-04          | 0.017                   | 0.8123               | 0.0234           | 0.0453           | N        |
| rs10810657         | 9p22.2      | <i>BNC2</i>      | A/T        | 5.7E-05          | 0.0268                  | 0.6183               | 0.1503           | 0.4562           | N        |
| <b>rs191177147</b> | <b>3q28</b> | <b>LPP</b>       | <b>G/T</b> | <b>1.0E-03</b>   | <b>0.0002</b>           | <b>0.9832</b>        | <b>0.7416</b>    | <b>0.8174</b>    | <b>N</b> |
| rs9275642          | 6p21.32     | <i>HLA-DQA2</i>  | C/T        | 2.7E-02          | 0.8354                  | 0.4512               | 0.2499           | 0.9685           | N        |
| rs73183643         | 7q22.1      | <i>CUX1</i>      | G/A        | 2.3E-04          | 0.7846                  | 0.9846               | 0.7022           | 0.6498           | N        |
| rs11993814         | 8q21.13     | <i>ZBTB10</i>    | C/T        | 4.5E-02          | 0.4267                  | 0.4773               | 0.6854           | 0.7465           | N        |
| rs2776353          | 21q22.3     | <i>LINC00111</i> | A/T        | 7.7E-04          | 0.6476                  | 0.7809               | 0.1028           | 0.2998           | N        |
| rs10425559         | 19p13.3     | <i>PLIN3</i>     | G/A        | 8.4E-01          | 0.0058                  | 0.9691               | 0.9614           | 0.5868           | N        |
| rs1050529          | 6p21.33     | <i>HLA-B</i>     | C/T        | 2.7E-01          | 0.2365                  | 0.162                | 0.7724           | 0.1615           | N        |
| rs7776701          | 7p12.3      | <i>TNS3</i>      | C/T        | 5.1E-01          | 0.6746                  | 0.4589               | 0.3433           | 0.0521           | N        |
| rs9267650          | 6p21.3      | <i>NEU1</i>      | A/T        | 2.0E-01          | 0.7232                  | 0.4631               | 0.688            | 0.7657           | N        |
| rs7907606          | 10q24.3     | <i>OBFC1</i>     | T/G        | 2.4E-02          | 0.0505                  | 0.5912               | 0.0194           | 0.397            | N        |
| rs4710154          | 6q27        | <i>MIR3939</i>   | A/T        | 4.3E-02          | 0.0021                  | 0.9838               | 0.8908           | 0.5559           | N        |
| rs2294214          | 6p22.3      | <i>CASC15</i>    | A/C        | 5.9E-05          | 0.2909                  | 0.3244               | 0.3393           | 0.0895           | N        |

“*P* for SNP” refers to logistic regression *P*-value in stage 2, “Int” to interaction, “PC” to previously confirmed susceptibility locus, and “N” to novel susceptibility locus.

**Supplementary Table 16. Meta-analysis for 4 SNPs within *OBFC1*, in linkage disequilibrium with index SNP rs7907606**

| SNP        | Region   | Gene         | Maj/<br>min | Stage 1 |                      |      |                 |                           | Stage 2 |                      |      |                 |      | Meta-analysis |      |                           |                      |      |                 |                         |                       |
|------------|----------|--------------|-------------|---------|----------------------|------|-----------------|---------------------------|---------|----------------------|------|-----------------|------|---------------|------|---------------------------|----------------------|------|-----------------|-------------------------|-----------------------|
|            |          |              |             | MAF     | <i>P</i>             | OR   | 95% CI          | Avg <i>r</i> <sup>2</sup> | MAF     | <i>P</i>             | OR   | 95% CI          | Affy | Illum         | Omni | Avg <i>r</i> <sup>2</sup> | <i>P</i>             | OR   | 95% CI          | <i>P</i> <sub>het</sub> | <i>I</i> <sup>2</sup> |
| rs9420907  | 10q24.33 | <i>OBFC1</i> | A/C         | 0.14    | 2.0×10 <sup>-7</sup> | 1.10 | (1.06,<br>1.14) | 1.00                      | 0.14    | 1.7×10 <sup>-1</sup> | 1.05 | (0.98,<br>1.13) | 1.00 | 1.00          | 1.00 | 1.00                      | 1.2×10 <sup>-7</sup> | 1.09 | (1.06,<br>1.13) | 0.24                    | 29%                   |
| rs9419958  | 10q24.33 | <i>OBFC1</i> | C/T         | 0.14    | 1.9×10 <sup>-7</sup> | 1.10 | (1.06,<br>1.14) | 1.00                      | 0.14    | 1.7×10 <sup>-1</sup> | 1.05 | (0.98,<br>1.13) | 1.00 | 1.00          | 1.00 | 1.00                      | 1.1×10 <sup>-7</sup> | 1.09 | (1.06,<br>1.13) | 0.23                    | 30%                   |
| rs4387287  | 10q24.33 | <i>OBFC1</i> | C/A         | 0.17    | 6.8×10 <sup>-8</sup> | 1.10 | (1.06,<br>1.14) | 0.98                      | 0.17    | 3.6×10 <sup>-2</sup> | 1.07 | (1,<br>1.15)    | 0.98 | 0.94          | 1.00 | 0.97                      | 6.7×10 <sup>-9</sup> | 1.09 | (1.06,<br>1.13) | 0.52                    | 0%                    |
| rs10786775 | 10q24.33 | <i>OBFC1</i> | C/G         | 0.10    | 4.4×10 <sup>-6</sup> | 1.11 | (1.06,<br>1.15) | 1.00                      | 0.10    | 6.9×10 <sup>-2</sup> | 1.08 | (0.99,<br>1.17) | 0.99 | 1.00          | 1.00 | 1.00                      | 7.0×10 <sup>-7</sup> | 1.10 | (1.06,<br>1.14) | 0.62                    | 0%                    |

For each SNP, we report rsID, genetic locus, gene, major and minor alleles, stage 1 minor allele frequency (MAF), *P* value for stage 1, odds ratio (for stage 1 overall, plus 95% CI), average imputation *r*<sup>2</sup> (for stage 1), MAF for stage 2, *P* value for stage 2, odds ratio (for stage 2 overall, plus 95% CI), average imputation *r*<sup>2</sup> (for Affy, Illumina, Omni, stage 2 overall), *P* value for meta-analysis, odds ratio (for meta-analysis overall, plus 95% CI), and *P*<sub>het</sub> and *I*<sup>2</sup> for meta-analysis. *P* values generated via logistic regression.

**Supplementary Table 17. Meta-analysis for 2 SNPs within *LPP*, in linkage disequilibrium with index SNP rs191177147**

| SNP       | Region | Gene       | Maj/<br>min | Stage 1 |                       |           |                 |           | Stage 2 |                      |           |                 |      | Meta-analysis |      |           |                       |           |                 |           |       |
|-----------|--------|------------|-------------|---------|-----------------------|-----------|-----------------|-----------|---------|----------------------|-----------|-----------------|------|---------------|------|-----------|-----------------------|-----------|-----------------|-----------|-------|
|           |        |            |             | MAF     | <i>P</i>              | <i>OR</i> | 95% CI          | Avg $r^2$ | MAF     | <i>P</i>             | <i>OR</i> | 95% CI          | Affy | Illum         | Omni | Avg $r^2$ | <i>P</i>              | <i>OR</i> | 95% CI          | $P_{het}$ | $I^2$ |
| rs1464510 | 3q28   | <i>LPP</i> | C/A         | 0.44    | $7.3 \times 10^{-11}$ | 0.92      | (0.89,<br>0.94) | 1.00      | 0.45    | $1.8 \times 10^{-3}$ | 0.92      | (0.88,<br>0.97) | 0.98 | 0.97          | 0.99 | 0.98      | $5.5 \times 10^{-13}$ | 0.92      | (0.9,<br>0.94)  | 0.83      | 0%    |
| rs9860547 | 3q28   | <i>LPP</i> | G/A         | 0.46    | $5.3 \times 10^{-10}$ | 1.09      | (1.06,<br>1.12) | 0.97      | 0.46    | $2.8 \times 10^{-3}$ | 1.08      | (1.03,<br>1.14) | 0.92 | 0.96          | 0.97 | 0.95      | $5.5 \times 10^{-12}$ | 1.09      | (1.06,<br>1.11) | 0.85      | 0%    |

For each *LPP* SNP, we report rsID, genetic locus, gene, major and minor alleles, stage 1 minor allele frequency (MAF), *P* value for stage 1, odds ratio (for stage 1 overall, plus 95% CI), average imputation  $r^2$  (for stage 1), MAF for stage 2, *P* value for stage 2, odds ratio (for stage 2 overall, plus 95% CI), average imputation  $r^2$  (for Affy, Illumina, Omni, stage 2 overall), *P* value for meta-analysis, odds ratio (for meta-analysis overall, plus 95% CI), and  $P_{het}$  and  $I^2$  for meta-analysis. *P* values generated via logistic regression.

**Supplementary Table 18. Meta-analysis for 1 SNP within *TICAM1*, in linkage disequilibrium with index SNP rs10425559**

| SNP       | Region  | Gene          | Maj/<br>min | Stage 1 |                      |           |              |           | Stage 2 |                      |           |              |      | Meta-analysis |      |           |                      |           |              |           |       |
|-----------|---------|---------------|-------------|---------|----------------------|-----------|--------------|-----------|---------|----------------------|-----------|--------------|------|---------------|------|-----------|----------------------|-----------|--------------|-----------|-------|
|           |         |               |             | MAF     | <i>P</i>             | <i>OR</i> | 95% CI       | Avg $r^2$ | MAF     | <i>P</i>             | <i>OR</i> | 95% CI       | Affy | Illum         | Omni | Avg $r^2$ | <i>P</i>             | <i>OR</i> | 95% CI       | $P_{het}$ | $I^2$ |
| rs7255265 | 19p13.3 | <i>TICAM1</i> | C/T         | 0.37    | $3.7 \times 10^{-7}$ | 0.93      | (0.91, 0.96) | 0.99      | 0.35    | $8.6 \times 10^{-1}$ | 0.99      | (0.94, 1.06) | 0.37 | 0.97          | 1.00 | 0.78      | $2.5 \times 10^{-6}$ | 0.94      | (0.92, 0.97) | 0.06      | 72%   |

For each SNP, we report rsID, genetic locus, gene, major and minor alleles, stage 1 minor allele frequency (MAF), *P* value for stage 1, odds ratio (for stage 1 overall, plus 95% CI), average imputation  $r^2$  (for stage 1), MAF for stage 2, *P* value for stage 2, odds ratio (for stage 2 overall, plus 95% CI), average imputation  $r^2$  (for Affy, Illumina, Omni, stage 2 overall), *P* value for meta-analysis, odds ratio (for meta-analysis overall, plus 95% CI), and  $P_{het}$  and  $I^2$  for meta-analysis. *P* values generated via logistic regression.



**Supplementary Table 19. Meta-analysis for 1 SNP in linkage disequilibrium with index SNP rs4710154**

| SNP       | Region | Gene           | Maj/<br>min | Stage 1 |                      |           |                |           | Stage 2 |                      |           |           |      |       | Meta-analysis |           |                      |           |                |           |       |
|-----------|--------|----------------|-------------|---------|----------------------|-----------|----------------|-----------|---------|----------------------|-----------|-----------|------|-------|---------------|-----------|----------------------|-----------|----------------|-----------|-------|
|           |        |                |             | MAF     | <i>P</i>             | <i>OR</i> | 95% CI         | Avg $r^2$ | MAF     | <i>P</i>             | <i>OR</i> | 95% CI    | Affy | Illum | Omni          | Avg $r^2$ | <i>P</i>             | <i>OR</i> | 95% CI         | $P_{het}$ | $I^2$ |
| rs9355610 | 6q27   | <i>RNASET2</i> | G/A         | 0.34    | $2.6 \times 10^{-7}$ | 1.07      | (1.05,<br>1.1) | 1.00      | 0.34    | $4.6 \times 10^{-2}$ | 1.05      | (1, 1.11) | 1.00 | 0.98  | 1.00          | 0.99      | $3.7 \times 10^{-8}$ | 1.07      | (1.04,<br>1.1) | 0.56      | 0%    |

For each SNP, we report rsID, genetic locus, gene, major and minor alleles, stage 1 minor allele frequency (MAF), *P* value for stage 1, odds ratio (for stage 1 overall, plus 95% CI), average imputation  $r^2$  (for stage 1), MAF for stage 2, *P* value for stage 2, odds ratio (for stage 2 overall, plus 95% CI), average imputation  $r^2$  (for Affy, Illumina, Omni, stage 2 overall), *P* value for meta-analysis, odds ratio (for meta-analysis overall, plus 95% CI), and  $P_{het}$  and  $I^2$  for meta-analysis. *P* values generated via logistic regression.

**Supplementary Table 20. Meta-analysis for 4 SNPs within *BNC2*, in linkage disequilibrium with index SNP rs10810657**

| SNP        | Region | Gene        | Maj/<br>min | Stage 1 |                       |           |                 |                           | Stage 2 |                      |           |                 |      | Meta-analysis |      |                           |                       |           |                 |                         |                       |
|------------|--------|-------------|-------------|---------|-----------------------|-----------|-----------------|---------------------------|---------|----------------------|-----------|-----------------|------|---------------|------|---------------------------|-----------------------|-----------|-----------------|-------------------------|-----------------------|
|            |        |             |             | MAF     | <i>P</i>              | <i>OR</i> | 95% CI          | Avg <i>r</i> <sup>2</sup> | MAF     | <i>P</i>             | <i>OR</i> | 95% CI          | Affy | Illum         | Omni | Avg <i>r</i> <sup>2</sup> | <i>P</i>              | <i>OR</i> | 95% CI          | <i>P</i> <sub>het</sub> | <i>I</i> <sup>2</sup> |
| rs62543565 | 9p22.2 | <i>BNC2</i> | A/C         | 0.41    | 1.1×10 <sup>-13</sup> | 0.90      | (0.87,<br>0.93) | 0.90                      | 0.40    | 3.5×10 <sup>-4</sup> | 0.91      | (0.86,<br>0.96) | 0.89 | 0.87          | 0.88 | 0.88                      | 2.2×10 <sup>-16</sup> | 0.90      | (0.88,<br>0.92) | 0.84                    | 0.0%                  |
| rs10756819 | 9p22.2 | <i>BNC2</i> | A/G         | 0.34    | 1.5×10 <sup>-5</sup>  | 0.94      | (0.92,<br>0.97) | 1.00                      | 0.34    | 7.7×10 <sup>-3</sup> | 0.93      | (0.88,<br>0.98) | 0.89 | 1.00          | 1.00 | 0.96                      | 4.2×10 <sup>-7</sup>  | 0.94      | (0.92,<br>0.96) | 0.67                    | 0.0%                  |
| rs2153271  | 9p22.2 | <i>BNC2</i> | T/C         | 0.42    | 1.5×10 <sup>-11</sup> | 0.91      | (0.89,<br>0.94) | 1.00                      | 0.42    | 4.8×10 <sup>-5</sup> | 0.90      | (0.85,<br>0.95) | 0.98 | 1.00          | 1.00 | 0.99                      | 4.3×10 <sup>-15</sup> | 0.91      | (0.89,<br>0.93) | 0.60                    | 0%                    |
| rs12350739 | 9p22.2 | <i>BNC2</i> | A/G         | 0.44    | 2.3×10 <sup>-12</sup> | 0.91      | (0.89,<br>0.93) | 0.97                      | 0.43    | 7.2×10 <sup>-6</sup> | 0.89      | (0.84,<br>0.93) | 0.90 | 0.97          | 0.96 | 0.94                      | 1.4×10 <sup>-16</sup> | 0.90      | (0.88,<br>0.93) | 0.41                    | 0.0%                  |

For each *BNC2* SNP, we report rsID, genetic locus, gene, major and minor alleles, stage 1 minor allele frequency (MAF), *P* value for stage 1, odds ratio (for stage 1 overall, plus 95% CI), average imputation *r*<sup>2</sup> (for stage 1), MAF for stage 2, *P* value for stage 2, odds ratio (for stage 2 overall, plus 95% CI), average imputation *r*<sup>2</sup> (for Affy, Illumina, Omni, stage 2 overall), *P* value for meta-analysis, odds ratio (for meta-analysis overall, plus 95% CI), and *P*<sub>het</sub> and *I*<sup>2</sup> for meta-analysis. *P* values generated via logistic regression.
